1 **TITLE PAGE**

2 **Title**

3 Overnutrition is a risk factor for iron deficiency in children and young people: a systematic  
4 review and meta-analysis of micronutrient deficiencies and the double burden of malnutrition

5 **Authors**

6 Xiaomian Tan, Pui Yee Tan, Yun Yun Gong and J. Bernadette Moore

7 **Author affiliations**

8 School of Food Sciences and Nutrition, University of Leeds, Leeds, UK

9 **Corresponding author**

10 J. Bernadette Moore,  
11 School of Food Science and Nutrition,  
12 University of Leeds,  
13 Leeds,  
14 West Yorkshire  
15 LS2 9JT  
16 T: +44(0)11334 39900  
17 E: J.B.Moore@leeds.ac.uk

18 **Running title**

19 Micronutrient deficiencies and body weight

20 **Keywords**

21 Iron, zinc, vitamin A, malnutrition, obesity; systematic review and meta-analysis; children;  
22 adolescence

## 23 **ABSTRACT**

### 24 **Introduction**

25 Traditionally associated with undernutrition, increasing evidence suggests micronutrient  
26 deficiencies can co-exist with overnutrition. Therefore, this work aimed to systematically  
27 review the associations between iron, zinc and vitamin A status and weight status (both under-  
28 and overweight) in children and young people.

### 29 **Methods**

30 Ovid Medline, Ovid Embase, Scopus, and Cochrane databases were systematically searched  
31 for observational studies assessing micronutrient status (blood, serum, or plasma levels of  
32 iron, zinc, or vitamin A biomarkers) and weight status (body mass index or other  
33 anthropometric measurement) in humans under 25 years of any ethnicity and gender. Risk of  
34 bias assessment was conducted using the American Dietetic Association Quality Criteria  
35 Checklist. Where possible, random effects restricted maximum likelihood (REML) meta-  
36 analyses were performed. PROSPERO (CRD42020221523).

### 37 **Results**

38 After screening, 83 observational studies involving 190,443 participants from 44 countries  
39 were identified, with many studies having reported on more than one micronutrient and/or  
40 weight status indicator. Iron was the most investigated micronutrient, with 46, 28, and 27  
41 studies reporting data for iron, zinc, and vitamin A status, respectively. Synthesizing 16  
42 records of odds ratio (OR) from 7 eligible studies, overnutrition (overweight and obesity)  
43 increased odds of iron deficiency (OR [95%CI]: 1.51 [1.20, 1.82],  $p < 0.0001$ ,  $I^2 = 40.7\%$ ). Odds  
44 appeared to be higher for children living with obesity (1.88 [1.33, 2.43],  $p < 0.0001$ ,  $I^2 = 20.6\%$ ) in  
45 comparison to those with overweight (1.31 [0.98, 1.64],  $p < 0.0001$ ,  $I^2 = 40.5\%$ ), although  
46 between group differences were not significant ( $p = 0.08$ ).

### 47 **Conclusions**

48 Overnutrition is associated with increased risk of iron deficiency, but not zinc or vitamin A  
49 deficiencies, with an inverted U-shaped relationship observed between iron status and  
50 bodyweight. Our results highlight significant heterogeneity in the reporting of micronutrient  
51 biomarkers and how deficiencies were defined. Inflammation status was rarely adequately  
52 accounted for, and the burden of iron deficiency may well be under-recognised, particularly in  
53 children and young people living with overnutrition.

54

55 **Key questions**

56

57 **What is already known on this topic** - summarise the state of scientific knowledge on this  
58 subject before you did your study and why this study needed to be done

- 59
- 60 • Low-and middle-income countries are increasingly facing a double burden of  
61 malnutrition; that is, the coexistence of undernutrition (stunting, wasting,  
62 underweight) with overnutrition (overweight and obesity).
  - 63 • While the relationship between undernutrition and critical micronutrients for childhood  
64 growth and development (e.g., iron, zinc, and vitamin A) is well established, less is  
65 known about the risk of micronutrient deficiencies in children and adolescents with  
66 overweight or obese, a hidden form of malnutrition.
  - 67 • There are limited data summarising associations between biomarkers of the most  
68 commonly limiting micronutrients and body weight status, particularly in children and  
young people.

69 **What this study adds** - summarise what we now know as a result of this study that we did  
70 not know before

- 71
- 72 • Overnutrition increases the risk of iron deficiency, but not zinc or vitamin A  
deficiencies.
  - 73 • There is an inverted U-shaped relationship observed between iron status and  
74 bodyweight in children and young people, with iron deficiencies observed more  
75 frequent in both under- and overnutrition.
  - 76 • Studies done to date have been heterogeneous in terms of populations studied,  
77 diagnostic criteria, and approaches to data analysis; few followed current guidelines  
78 for measuring inflammation and defining micronutrient deficiencies.

79 **How this study might affect research, practice or policy** - summarise the implications of  
80 this study

- 81
- 82 • Increased recognition by healthcare practitioners that children and young people  
83 living with overweight, or obesity are likely to be iron deficient; thereby improving  
clinical practice and care.
  - 84 • The gaps in evidence highlighted are addressed, with more research from currently  
85 underrepresented counties examining micronutrient deficiencies and the double  
86 burden of malnutrition.
  - 87 • The weaknesses in study design and reporting highlighted are addressed, with  
88 improved quality and reporting of micronutrient assessment in children and young  
89 people.

90

91

## 92 INTRODUCTION

93 Deficiencies in micronutrients contribute to impaired immune function, poor growth and  
94 physical development, and increased morbidity and mortality in children<sup>1 2</sup>. Public health  
95 prevention strategies such as supplementation, fortification, and nutrition education are  
96 therefore strongly encouraged by the World Health Organisation and UNICEF in low- and  
97 middle-income countries (LMICs)<sup>3 4</sup>. Although great strides have been made in the last century  
98 to address micronutrient deficiencies (MNDs) and reduce childhood mortality rates,  
99 disappointingly in 2013 (median year of data collection), the global prevalence of deficiency in  
100 one or more micronutrients was estimated to be 56% in children under 5 years old, although  
101 rates vary across countries<sup>5 6</sup>.

102 Among the micronutrients, deficiencies in iron, zinc and vitamin A remain particularly  
103 prevalent and causally associated with adverse health outcomes for children. Iron deficiency  
104 (ID) and iron deficiency anaemia (IDA) are major global health challenges affecting more than  
105 1.2 billion people worldwide<sup>7</sup>. In addition to iron deficiency, it is estimated that more than 25%  
106 of South Asia and Sub-Saharan African populations are at risk of insufficient dietary zinc intake,  
107 with some countries particularly deficient<sup>8</sup>. In a large population survey in Ethiopia for example,  
108 the prevalence of zinc deficiency among young children was found to be a shocking 89%,  
109 improving somewhat in school children to 71%<sup>9</sup>. Similarly in Southeast Asia in Vietnam, in  
110 2010 the prevalence of zinc deficiency was remarkably high (68%) in young children,  
111 improving to 42% in children over 5 years of age<sup>10</sup>. Moreover, although large-scale vitamin A  
112 supplementation programmes have been implemented in many countries<sup>2</sup>, subclinical vitamin  
113 A insufficiency is still prevalent in Vietnam (10.1%, young children aged 5-75 months old) from  
114 Vietnam nationwide food consumption survey<sup>10</sup> and Africa (Ethiopia, 45.4% for 6–72 months  
115 old children from meta-analysis in 2020<sup>11</sup>), and often observed in the context of multiple  
116 micronutrient deficiencies<sup>12</sup>.

117 Historically MNDs were considered as one of the four forms of undernutrition,  
118 alongside wasting, stunting and underweight<sup>13</sup>, and a particular concern for LMICs where  
119 undernutrition may be the leading cause of childhood mortality for children under five<sup>2 14</sup>.  
120 However increasingly, it is recognised that MNDs also occur in the context of overweight and  
121 obesity<sup>15</sup>. Deficiencies in iron<sup>16</sup>, zinc<sup>17</sup>, and vitamin A<sup>18</sup> have been observed in adults living  
122 with overweight and obesity and associated metabolic diseases. Typically associated with  
123 nutrient-poor, energy-dense diets, the presence of multiple micronutrient deficiencies in the  
124 absence of an energy-deficit diet has been described as ‘hidden hunger’<sup>19</sup>. While in high-  
125 income countries obesity is associated with ultra-processed foods that are high in fat, sugar,  
126 salt, and energy; in LMICs overweight and obesity is often associated with poverty and  
127 monotonous diets with limited choices of low-cost energy-dense staples such as corn, wheat,

128 rice, and potatoes<sup>19 20</sup>. Even in high income countries, childhood obesity is strongly linked to  
129 poverty and socioeconomic and health disparities<sup>21</sup>.

130 Moreover, many LMICs are now facing a double burden of malnutrition with the co-  
131 existence of an increasing prevalence of overnutrition alongside undernutrition<sup>22</sup>. This is  
132 intricately linked to the rapid increase in the global prevalence of obesity, especially in 5–19  
133 years old children in recent decades<sup>23</sup>. Deficiencies in multiple micronutrients including iron<sup>24</sup>  
134 <sup>25</sup>, zinc<sup>17 26</sup>, and vitamin A<sup>27 28</sup> have also been observed in children living with malnutrition.  
135 Indeed, the term ‘triple burden of malnutrition’ aims to underscore the coexistence of  
136 micronutrient deficiencies alongside undernutrition (stunting, wasting, underweight) and  
137 overnutrition<sup>29</sup>.

138 While increasing evidence now suggests micronutrient deficiencies are associated  
139 with overnutrition as well as undernutrition, to date there have been only a limited number of  
140 reports summarising associations between biomarkers of micronutrient status and obesity in  
141 children and young people. In one meta-analysis of multiple co-morbidities associated with  
142 obesity in children, higher odds ratio (OR) for both vitamin D deficiency [OR (95% CI): 1.9 (1.4,  
143 2.5)] and iron deficiency (OR 2.1, 95% CI 1.4, 3.2) were found in children under age ten living  
144 with obesity<sup>30</sup>. Similarly, a separate meta-analysis of vitamin D deficiency in children and  
145 adolescents aged 0-18 years old, also found a positive association between obesity and  
146 vitamin D deficiency (OR 1.4, 95% CI 1.3, 1.6)<sup>31</sup>. However, to our knowledge the risks of iron,  
147 zinc, and vitamin A deficiencies, the most frequently limiting micronutrients in children and  
148 young people, have not been collectively examined. Therefore, in this work we aimed to  
149 systematically review the associations between iron, zinc and vitamin A status and body  
150 weight in children and young people, using meta-analyses to summarise where sufficient data  
151 existed.

152

## 153 **METHODS**

154 This review was conducted following the Preferred Reporting Items for Systematic  
155 Reviews and Meta-Analyses (PRISMA) guidelines<sup>32</sup>, and was registered at Prospero  
156 (CRD42020221523).

### 157 **Search strategy**

158 The Ovid Medline, Ovid Embase, Scopus, and Cochrane databases were  
159 systematically searched through 19 April 2023. A combination of keywords and related MeSH  
160 terms were used from three main themes: i) population: infants, children, adolescents and  
161 young adults; ii) malnutrition indicators, including under- and overnutrition; and iii) blood  
162 micronutrient indicators for iron, zinc, and vitamin A. The specific search strategies developed  
163 for each database are reported in **Supplementary Tables S1-4**.

### 164 **Inclusion and exclusion criteria**

165 Observational studies in humans under 25 years old<sup>33</sup>, of any nationality, gender or  
166 ethnicity, with under- or overnutrition diagnosed by body mass index (BMI) or other  
167 anthropometric measurement, were included. Studies had to have measured as primary  
168 outcomes either: a blood or serum test of micronutrient level, OR or relative risk of  
169 micronutrient deficiencies, or the linear regression between a micronutrient indicator and  
170 weight status to be included. Records excluded from this review were: non-English articles,  
171 short reports, communications, address, case reports, comments, letters, editorial matters,  
172 meta-analyses, news, reviews, conference abstracts, studies with unrepresentative samples  
173 (either convenience sampling or  $n < 100$ ), studies not reporting primary outcomes of interest,  
174 studies reporting associations with combined micronutrient deficiencies, and studies of  
175 micronutrient supplement interventions. Studies that assessed anaemia diagnosed with only  
176 haemoglobin were excluded, as not specific to iron deficiency.

### 177 **Study selection**

178 The screening of identified studies was managed using the web based Rayyan  
179 software<sup>34</sup>. The selection of the eligible studies for inclusion in this review was assessed and  
180 agreed by two independent reviewers (XT and PYT). Disagreement between reviewers were  
181 resolved by discussion, or by third reviewer if necessary.

### 182 **Data extraction**

183 A standardised data extraction form was utilised to extract the following information:  
184 first author, year of publication, year of study, study design, country, participants'  
185 characteristics (e.g., sample size, recruitment, gender, age, socioeconomic status etc.),  
186 exposure (e.g., anthropometric indicators and blood/serum levels of micronutrients of interest),  
187 control or non-exposure (e.g., children who were not malnourished), outcome measures (e.g.,  
188 changes in anthropometric indicators in the presence of micronutrient deficiencies or  
189 otherwise changes in the blood micronutrients levels in different anthropometry groups), main

190 findings (e.g., differences in mean,  $\beta$  coefficient, OR, relative risk), and funding or  
191 sponsorship.

## 192 **Risk of bias assessment**

193 Risk of bias was assessed by two reviewers using the Quality Criteria Checklist  
194 developed by the Academy of Nutrition and Dietetics<sup>35</sup>. Any disagreement was resolved by  
195 discussion, and by a third reviewer if necessary. This tool has 10 validity questions: 1) clear  
196 research question, 2) non-biased participant recruitment, 3) group comparability, 4) report of  
197 withdrawals/participant ratio, 5) blinding, 6) study procedures description, 7) outcome, 8)  
198 appropriate statistical method and adequate adjustments, 9) conclusion supported by results,  
199 and 10) conflict of interest. The overall rating was defined as either positive (majority of criteria  
200 above were met, in which criteria 2,3,6,7 must be met), neutral (any of criteria 2,3,6,7 was not  
201 met), or negative (six or more of the criteria not being met).

## 202 **Data analysis**

203 The associations (e.g., OR, relative risk, linear regression) between the blood  
204 micronutrient levels of interests and anthropometry status were curated in tables according to  
205 micronutrient. Mean micronutrient levels between anthropometry groups were included if there  
206 was no further analysis of data. For the convenience of summarising, the main findings of  
207 each study were concluded as either direct associations (micronutrient levels increased with  
208 increasing weight status indicators) or inverse associations (decreased micronutrient levels —  
209 increasing risk of micronutrient deficiencies— with increasing weight status indicators).

210 Weight status indicators included BMI-for-age z score (BAZ) and BMI used to  
211 categorise overnutrition. While for undernutrition, height-for-age z score (HAZ), weight-for-age  
212 z score (WAZ), and weight-for-height z score (WHZ) were used to categorise stunting, wasting  
213 and underweight respectively, following the WHO growth chart, obesity work taskforce, or  
214 national standard in respect to each country. Micronutrient status indicators included: blood  
215 micronutrient levels (iron, zinc, retinol), haemoglobin (Hb), iron profile,  $\beta$ -carotene, retinol  
216 binding protein, or diagnosis of ID, IDA, zinc deficiency or VAD. The diagnostic criteria of  
217 micronutrient deficiencies mostly followed either WHO criteria, or the International Zinc  
218 Nutrition Consultative Group standard, or country-specific standards for defining micronutrient  
219 deficiencies.

220 Where there were at least 5 studies<sup>36</sup> assessing the risk of MNDs in malnutrition groups  
221 comparing with normal weight group, random effects restricted maximum likelihood (REML)  
222 meta-analyses were conducted to estimate the OR with 95% CI using STATA 18 (Stata  
223 Corporation, College Station, TX, US). Heterogeneity across the studies was evaluated using  
224  $I^2$ . Sensitivity analysis was conducted by using the leave-one-out method, to compare the  
225 pooled OR before and after eliminating each study at a time. To detect publication bias, the

226 asymmetry of the funnel plot was examined. Statistical significance was set at  $P < 0.05$ . To  
227 avoid overestimation of power, the gender-stratified data were not included in meta-analysis  
228 if overall population data were reported by the study. All graphics were produced in either  
229 STATA or using the R-package ggplot2<sup>37</sup>, ggalluvial<sup>38</sup> and rworldmap<sup>39</sup> in the R environment<sup>40</sup>.  
230



## 231 RESULTS

232 Utilising systematic search strategies, a total of 9711 articles were initially identified  
233 from four databases, of which, 5459 articles remained after deduplication. After title and  
234 abstract screening, the full texts of 151 articles were assessed to check for eligibility. From  
235 these, 83 observational studies met the inclusion criteria, and 7 studies were eligible for meta-  
236 analysis (**Figure 1**).

237 Overall, the 83 studies involved a total of 190,443 participants from 44 countries  
238 (**Figure 2**). The majority (n=74, 89.1%) were cross-sectional studies, and the number of  
239 participants in individual studies ranged from n=101<sup>41</sup> to n=64,850 (the China National  
240 Nutrition and Health Survey of Children and Lactating Mothers study, 2016–2017<sup>42</sup>), with a  
241 median n=675 participants. Notably, many studies assessed more than one micronutrient  
242 and/or weight status indicator at the same time. Iron was the most investigated micronutrient,  
243 with a total of 46 (n=10, 21 and 15 for both, overnutrition and undernutrition, respectively) 28  
244 (n=4, 8 and 16 for both, overnutrition and undernutrition, respectively) and 27 (n=5, 12, 10 for  
245 both, overnutrition and undernutrition, respectively) studies identified for iron (**Table 1**), zinc  
246 (**Table 2**), and vitamin A (**Table 3**), respectively.

### 247 Associations between iron and weight status

248 The characteristics and findings of the studies that reported associations between iron  
249 status and weight status in children and young people (n=46) are summarised in **Table 1**. Ten  
250 studies assessed both sides of malnutrition, whereas 21 studies focused on overnutrition, and  
251 15 studies focused on undernutrition. Although a broad range of biomarkers for ID and  
252 overnutrition were used by the different studies with many using more than one, and most at  
253 least utilised serum ferritin as a minimum to assess iron status (**Table 1**). In 2020 the WHO  
254 revised their guidance on the use of ferritin to assess iron status in individuals and populations,  
255 providing thresholds of <15µg/L for healthy individuals above 5 years of age and <70µg/L for  
256 individuals with infection or inflammation (<12µg/L or <30µg/L are used for children under 5).  
257 While current WHO guidance is that ferritin, both an iron storage protein and an acute phase  
258 reactant associated with inflammation<sup>43</sup>, should not be used alone to diagnose ID without other  
259 iron profile biomarkers or corrections for inflammation<sup>44</sup>, a minority of studies did rely on ferritin  
260 alone<sup>25 49 100-102</sup>. Likewise, serum iron alone should not be used in isolation to diagnose ID as  
261 serum iron levels will be reduced in the context of infection or inflammation<sup>98</sup>, but was used in  
262 a handful of studies<sup>43 46 47</sup>. In risk of bias assessment, most studies were found to be of positive  
263 quality (38 out of 47; **Table 1, Table S5**). Only one study was found of negative quality<sup>45</sup>, with  
264 no appropriate statistical method and adequate adjustments the most common reason for  
265 studies being rated either neutral or negative quality (**Table S5**).

266 A total of 16 records reported OR from 7 eligible studies enabling our calculation of the  
267 pooled OR for ID with overnutrition (overweight or obesity) using the normal weight groups as  
268 reference. These studies assessed overnutrition and ID in North American (US<sup>46-48</sup> and  
269 Mexico<sup>49</sup>) and European (Spain<sup>50</sup> and Greece<sup>51 52</sup>) populations; and, in risk of bias assessment,  
270 all were assessed as positive (good) quality. The random-effects model meta-analysis  
271 indicated a pooled OR (95% CI) of 1.51 (1.20, 1.82),  $p < 0.0001$  for ID with overnutrition (**Figure**  
272 **3**). Heterogeneity was moderate with a  $I^2$  value of 40.73%, likely a result of the diversity of  
273 ethnicities, ages and genders studied; as well as the broad range of biomarkers for ID and  
274 overnutrition used by the different studies. Subgroup analyses suggested increased risk of ID  
275 in those living with obesity OR (95%CI): 1.88 (1.33, 2.43),  $p < 0.0001$  compared to overweight  
276 OR (95%CI): 1.31(0.98, 1.64),  $p < 0.0001$ ; however between group differences were not  
277 statistically different ( $p = 0.08$ ), likely driven by greater heterogeneity in the overweight versus  
278 obesity data ( $I^2$  40.46% versus 20.0%, **Figure 3**).

279 Similarly, no differences were observed between studies that reported data separately  
280 for males and females versus those that reported data from mixed-gender populations ( $p = 0.47$ ,  
281 **Figure S1**). Funnel plot analyses suggested some asymmetry driven by two outliers (**Figure**  
282 **S2**). These studies reported higher prevalence of ID in both overweight and obese mixed-  
283 gender populations, with much larger standard errors observed in the (fewer) children with  
284 obesity (**Figure 3**)<sup>46 49</sup>. As they contributed only small weights to the meta-analysis (Brotanek  
285 et al: 0.46%, Cepeda-Lopez et al: 0.35%), this is a small-study effect rather than non-reporting  
286 bias, and indeed funnel analyses with fewer than 10 studies should be interpreted cautiously<sup>53</sup>.  
287 Sensitivity analyses indicated robustness in the overall results as the effect size was not  
288 significantly changed after removing any of the studies (**Figure S3**).

289 Given that the meta-analysis incorporated only a small subset (7 of 46) of iron studies,  
290 to synthesize the findings across all studies, we examined the numbers of participants in the  
291 reports concluding either direct, inverse, or no significant associations between iron deficiency  
292 and nutrition status (**Figure 4A**). These data illustrate surprising heterogeneity in the  
293 conclusions of individual studies and show where individual studies contributed  
294 disproportionately larger populations. In the case of iron and undernutrition, while 13 reports  
295 that included 15,335 participants found a direct association (i.e., improved iron status as move  
296 from undernutrition to normal bodyweight), a surprising 10 studies that included 30,705  
297 participants found no association, and 2 concluded an inverse association (**Figure 4A**).  
298 Notably, the 2 studies that found an inverse association had reported linear regression  
299 between iron and both under- and overnutrition (BMI 14-32<sup>54</sup> and BMI-z score between -4 and  
300 2<sup>55</sup>). However, the associated scatter plots suggest piecewise regression would be more  
301 appropriate as very low ferritin values were observed in both the lowest and highest quintiles  
302 of nutrition status. While the data for overnutrition appear clearer, with 19 reports including

303 27,894 participants concluding an inverse relationship (i.e., worsening iron status as weight  
304 status moves from normal to overweight and obesity), nonetheless 9 reports with 8,884  
305 participants concluded a direct association and 3 found no association (**Figure 4A**).

306 While these conflicting results likely reflect different populations studied and the  
307 challenges of ID diagnosis, nonetheless, we conclude the data collectively suggest an inverted  
308 U-shaped relationship between iron status and bodyweight; with children and young people  
309 living with overnutrition having a higher risk [pooled OR (95% CI): 1.51 (1.20, 1.82)] of iron  
310 deficiency alongside those with undernutrition.

### 311 **Associations between zinc and weight status**

312 The 28 studies that examined zinc status and either under- or overnutrition were  
313 similarly diverse in their approaches and findings (**Table 2**). While all 28 studies measured  
314 either plasma or serum zinc, how they were compared statistically (e.g. mean, median, quartile  
315 (Q) Q2-4 versus Q1), varied between studies, and precluded any meta-analysis. We note only  
316 2 studies<sup>26 56</sup> used international consensus-based thresholds (57-74 µg/dL depending on age  
317 group, sex, time of day and time since last meal<sup>57</sup>) for defining deficiency, which may explain  
318 some of the heterogeneity in conclusions between studies here. In addition, although plasma  
319 or serum zinc concentration is the most used biomarker of zinc status, there are well described  
320 issues with sensitivity and specificity, as well as challenges with sample collection and storage,  
321 that render the assessment of dietary zinc status in humans challenging<sup>58</sup>. In risk of bias  
322 assessment, most studies (22 out of 28) received a positive quality rating.

323 Although a direct relationship between zinc status and undernutrition was concluded  
324 by the majority of studies (12 of 20 accounting for 72,537 participants; **Figure 4B**), the results  
325 from reports on overnutrition were more contradictory. While 4 studies concluded direct  
326 associations between zinc levels and BMI<sup>42 59-61</sup>, 2 found inverse relationships<sup>62 63</sup> and 6  
327 studies, accounting for 13,440 participants in 4 countries (3 from Iran<sup>64-66</sup>, and 1 from  
328 Colombia<sup>67</sup>, Australia<sup>68</sup>, and China<sup>69</sup>), concluded no association between zinc status and  
329 overweight (**Figure 4B**). Among the studies reporting direct associations with both under- and  
330 overnutrition was an exceptionally large population study from China with >64,000  
331 participants<sup>42</sup>. While in this cohort stunting conferred a higher risk of zinc deficiency [OR  
332 (95%CI): 1.44 (1.19-1.75)], and overweight and obesity appeared to confer protection  
333 [overweight: 0.88 (0.84, 0.96); obesity: 0.78 (0.70, 0.86)], serum zinc values were not hugely  
334 different between groups and within adequate population ranges<sup>57 70</sup>; with 86.0µg/dL (77.0,  
335 96.0) reported for children with stunting, and 91.0µg/dL (82.0, 101.0) for children living with  
336 obesity<sup>42</sup>. Relatedly, in the larger (n=5,404 American children aged 5-19) the overall  
337 population mean and (range) of zinc levels were similarly adequate, 82.7µg/dL (38.9, 198.6)<sup>62</sup>.

338 In sum, while the data were more limited for zinc, they suggest an exponential plateau  
339 curve relationship between zinc status and bodyweight, with children and young people living  
340 with severe undernutrition having the highest risk for zinc deficiencies, and no evidence for a  
341 higher risk for zinc deficiency with overnutrition.

### 342 **Associations between vitamin A and weight status**

343 The studies that investigated vitamin A status in relation to body weight were similarly  
344 heterogenous in their approaches to assessing both vitamin A and nutrition status (**Table 3**).  
345 Vitamin A was commonly assessed by measuring plasma/serum retinol levels, although some  
346 studies measured either serum carotenoids,  $\beta$ -carotene, or retinal binding protein (RBP) levels.  
347 However, plasma/serum retinol concentration is under tight homeostatic control and does not  
348 reflect vitamin A status until body stores are extremely low or very high<sup>71</sup>. Where low serum  
349 retinol was defined, WHO cut-offs (retinol<0.7 $\mu$ mol/L, equivalent to 20 $\mu$ g/dL<sup>72</sup>) were most  
350 often but not always used. These values are not sensitive to moderate vitamin A deficiencies,  
351 and like with zinc, studies often examined results by comparing bottom and top quartiles of  
352 the biomarkers measured. As with the zinc studies, variability in the outcomes measured and  
353 statistical approaches between studies prevented us from performing meta-analysis, and the  
354 majority of studies received positive quality ratings (23 out of 27; **Table 3, Table S5**).

355 While a direct relationship between undernutrition and vitamin A deficiency was clear  
356 with 13 of 15 studies concluding a direct association, other 2 reported no association (**Figure**  
357 **4C**), the data for associations between overnutrition and vitamin A deficiency were more  
358 contradictory. Although in favour of a direct relationship between vitamin A status (n=10 of 17  
359 studies, accounting for 19,443 participants), 5 found an inverse association and 2 found no  
360 association (**Figure 4C**). In the 10 studies that found a direct relationship, these were reported  
361 in a variety of ways, such as: lower risk of VAD in the context of overweight or obese<sup>69 73-77</sup>, or  
362 elevated serum levels of vitamin A or plasma retinol in children with overweight or obesity<sup>67 78-</sup>  
363 <sup>80</sup>. Interestingly, of the 5 studies that concluded an inverse association between overnutrition  
364 and vitamin A deficiency, 4 focused on Brazilian children. The associations were reported  
365 either as increased risk of VAD<sup>28</sup>, or risk of low carotenoids<sup>81 82</sup>, for overweight children aged  
366 5-19 with around 500 participants in each study. While in one case, low plasma retinol (<0.70  
367  $\mu$ mol/L) was associated with overweight in Brazilian children aged 12–59 months old  
368 (n=1503)<sup>83</sup>. The fifth, non-Brazilian, study assessed 7–11 years old children (n=1928) in  
369 Chongqing, China<sup>84</sup>, and found that obesity increased the risk of VAD, OR (95%CI):2.37 (1.59,  
370 3.55).

371 In the context of the tight homeostatic mechanisms for plasma retinol levels<sup>71</sup> we  
372 conclude that similar to zinc, the data suggest an exponential plateau curve relationship  
373 between vitamin A status and bodyweight, with children and young people living with severe

374    undernutrition having the highest risk for vitamin A deficiencies, and no evidence for a higher  
375    risk for zinc deficiency with overnutrition.

376            Lastly, regional differences were observed both in terms of which micronutrients were  
377    more frequently investigated and whether populations with under- or overnutrition or both were  
378    investigated (**Figure 5**). Studies from North America and Europe (**Figure 5A**) focused entirely  
379    on overnutrition and largely on iron. Whereas reports from the Western Pacific (**Figure 5B**),  
380    Asia (**Figure 5C**) and Latin America (**Figure 5D**) assessed both under- and overnutrition, most  
381    studies in Africa (**Figure 5E**) focused on undernutrition.

382

## 383 DISCUSSION

384 To our knowledge, this is the first systematic review of the associations between weight  
385 status in children and young people and iron, zinc, and vitamin A deficiencies, to concurrently  
386 examine associations with both under- and overweight, i.e., the double burden of malnutrition.  
387 Notably, our results suggest an inverted U-shaped relationship between iron status and  
388 bodyweight, with both under- and overnutrition increasing risk for ID. In meta-analyses children  
389 and young people living with overnutrition had a higher risk [pooled OR (95% CI): 1.51 (1.20,  
390 1.82)] of iron deficiency, with those living with obesity having even higher risk [pooled OR (95%  
391 CI): 1.88 (1.33, 2.43)] compared to those with normal weight. In contrast, zinc and vitamin A  
392 deficiencies were most observed in children and young people with undernutrition. While in  
393 aggregate, the studies underscore the increased risks for iron, zinc, and vitamin A deficiencies  
394 with undernutrition in childhood and adolescence, there was more heterogeneity in study  
395 conclusions (i.e., several studies finding no relationship) for iron and zinc. Such heterogeneity  
396 in part relates to the methodological challenges of assessing the status of these micronutrients  
397 in humans. Indeed, our results highlight how variable the approaches to measuring and  
398 reporting dietary nutrient deficiencies have been, as well as regional data gaps, with important  
399 implications for future study design.

400 Excess adiposity is associated with low-grade inflammation, widely proposed to be the  
401 mechanism behind reduced iron status observed in adults living with obesity<sup>85 86</sup>. With the  
402 expansion of adipose tissue comes macrophage infiltration and release of inflammatory  
403 cytokines such as IL-6, that stimulate the synthesis of acute phase proteins such as ferritin  
404 and hepcidin, the main regulator of systemic iron homeostasis<sup>85</sup>. Hepcidin prevents iron  
405 absorption from the enterocytes and iron release from splenic macrophages, thereby reducing  
406 circulating iron levels overall<sup>86</sup>. In acute infection, this serves to deprive a pathogen of iron<sup>87</sup>,  
407 but in the context of chronic disease with prolonged immune activation can lead to anaemia  
408 of chronic disease<sup>88</sup>. The results of our meta-analysis, showing a higher risk of iron deficiency  
409 with overnutrition, particularly in children and young people living with obesity, are consistent  
410 with those seen in adults<sup>16</sup>; and suggest inflammation as a factor, however inflammatory  
411 markers were only rarely measured.

412 Inflammatory status is particularly relevant as ferritin was the primary blood biomarker  
413 of iron status used, consistently found higher in obese groups compared to children with  
414 normal weight and direct linear association reported in multiple studies<sup>25 50 55 59 79 89-99</sup>. However,  
415 as ferritin is an acute phase reactant, inflammation can obscure ID<sup>100</sup>, therefore when the  
416 WHO reviewed their guidance on the use of ferritin to assess iron status in 2020<sup>44</sup>, they made  
417 the strong recommendation that in areas of widespread infection or inflammation, serum  
418 ferritin should be measured alongside both C-reactive protein (CRP) and  $\alpha$ -1 acid glycoprotein  
419 (AGP), which reflect different phases of the acute phase response from acute infection to



420 chronic inflammation. In addition, they recommend that thresholds to define ID in individuals  
421 with infection or inflammation should be raised to 30  $\mu\text{g/L}$  for children under five and 70  $\mu\text{g/L}$   
422 serum ferritin for all age groups over five<sup>44</sup>. However, very few studies (n=4 out of 23 studies  
423 that used ferritin with or without other biomarkers) to define ID) measured and excluded  
424 participants with elevated CRP level<sup>94 98 99 101</sup>. Only one study measured AGP<sup>102</sup> and only 2  
425 studies from Colombia<sup>79</sup> and Brazil<sup>103</sup> utilised the higher thresholds for ferritin to define ID in  
426 the context of inflammation. Interestingly, the WHO serum ferritin concentration thresholds  
427 were based on expert opinion<sup>44</sup>, and a recent analysis of serial cross-sectional NHANES data  
428 concluded thresholds for ferritin for iron-deficient erythropoiesis should be higher, at least for  
429 healthy American children and women<sup>104</sup>. Specifically, from regression models of the  
430 distributions of haemoglobin and sTfR with serum ferritin in 2569 and 7498 healthy children  
431 under five and women (15-49 years old) they derived 20  $\mu\text{g/L}$  for children under five and 25  
432  $\mu\text{g/L}$  in women as physiologically based serum ferritin thresholds for ID. These data suggest  
433 that the global burden of iron deficiency in children and young people may well be  
434 underestimated.

435 In contrast to iron, our results show that zinc and vitamin A deficiencies were most  
436 observed in undernutrition, with limited evidence for a higher risk for deficiency with  
437 overnutrition. While variability in the outcomes measured and statistical approaches between  
438 studies precluded meta-analyses, critical review of the data in aggregate suggest an  
439 exponential plateau curve relationships between zinc or vitamin A status and bodyweight, with  
440 children and young people living with severe undernutrition having the highest risk for these  
441 micronutrient deficiencies. Nonetheless, considerable uncertainty in the evidence base  
442 remains, particularly for overnutrition. This is not least of all because of efficient homeostatic  
443 mechanisms that buffer plasma zinc and vitamin A levels to either dietary deficiency or excess,  
444 thereby maintaining plasma concentrations within a narrow range, and preventing toxicity in  
445 the case of vitamin A<sup>71 105</sup>. Therefore, more moderate deficiencies in overnutrition may be  
446 masked. In addition, mechanistically there are complicated interactions between the  
447 micronutrients themselves (e.g. vitamin A deficiency impairs iron mobilisation and vitamin A  
448 supplementation will improve haemoglobin concentrations<sup>105</sup>), and between overnutrition,  
449 inflammation and micronutrient metabolism.

450 Indeed, our comprehensive review highlights the challenges of micronutrient  
451 assessment at an individual and population level with important implications for future study  
452 design and reporting in the context of the double burden of malnutrition. The most commonly  
453 used biomarkers of micronutrient status (plasma/serum ferritin, zinc, and retinol levels) are  
454 sensitive to a variety of stimuli, including infection and inflammation<sup>72</sup>, and a primary  
455 recommendation for future work investigating MNDs in either under- or overnutrition is that

456 CRP and AGP are routinely measured, and inflammation accounted for in line with current  
457 expert guidelines. While in the case of iron, ferritin increases with inflammation and ID may be  
458 underestimated and thresholds for deficiency should be raised<sup>106</sup>, in the cases of zinc and  
459 vitamin A, deficiencies may be overestimated as both plasma/serum zinc and retinol are, at  
460 least transiently, lowered in acute infection or inflammation<sup>107 108</sup>. Conversely, additional  
461 challenges with zinc measurement exist as careful sample collection and handling is critical to  
462 prevent haemolysis or contamination from adventitious zinc in the environment<sup>57</sup>, which may  
463 mask deficiencies, a potential confounder in the studies that surprisingly did not find zinc  
464 deficiency associated with undernutrition. If CRP and AGP are measured, inflammation can  
465 be adjusted for by either exclusion, the use of correction factors, or linear regression  
466 approaches recently proposed by the Biomarkers Reflecting Inflammation and Nutritional  
467 Determinants of Anaemia (BRINDA) project<sup>109</sup>. Regression approaches have now been  
468 systematically developed and used to adjust for ferritin<sup>110</sup>, zinc<sup>108</sup> and vitamin A<sup>107</sup> values on a  
469 continuous scale.

470 In addition, our work highlights that many studies did not apply consensus-based cut-  
471 offs for defining either iron, zinc or vitamin A deficiencies but rather compared lower to upper  
472 quartiles of plasma/serum biomarkers within their populations, often not specifying the  
473 measured ranges of biomarkers within quartiles. Such calculations may overestimate risks of  
474 deficiencies in largely replete populations, and their widespread use may explain some of the  
475 seeming contradictory conclusions. Lastly, our data highlights regional data gaps and  
476 differences in study focus, with most studies from Africa and Asia focused on undernutrition  
477 and those from North America and Europe focused entirely on overnutrition. This is concerning  
478 both Africa and Asia experienced dramatic increases in the number of overweight children  
479 under 5 between 2000 and 2017 (from 6.6 to 9.7 million children in Africa and from 13.9 to  
480 17.5 million children in Asia)<sup>111</sup>. Moreover, the regions of Africa and Asia have the highest  
481 double burden of malnutrition with large numbers of stunted and wasted children, and the  
482 number of stunted children under 5 having increased from 50.6 to 58.7 million children in  
483 Africa<sup>111</sup>. These stark data underscore that the investigation of MNDs in relation to the double  
484 burden of malnutrition remains critically important for child health.

485 This is the first study to concurrently, comprehensively review the associations  
486 between iron, zinc, and vitamin A deficiencies and the double burden of malnutrition in children  
487 and young people. In general, undernutrition groups were reported to have lower  
488 plasma/serum ferritin, zinc, and retinol levels, or found to have higher risks for iron, zinc, and  
489 vitamin A deficiencies. Evidence gaps notwithstanding, we conclude that overnutrition was  
490 associated with iron deficiency, but not zinc or vitamin A deficiencies. Strengths of this work  
491 included our comprehensive search strategy with robust inclusion and exclusion criteria and  
492 *a priori* registration of detailed review protocol in line with PRISMA guidelines<sup>32</sup> and utilising



493 the PICO approach<sup>112</sup>. In addition, this systematic review included populations across the  
494 globe (including North American and Europe, Latin American, Western Pacific, Asia and Africa  
495 continents), which allowed us to identify regional data gaps and differences in term of their  
496 nutritional outcomes or micronutrients of interests and the associations reported. While we  
497 excluded studies with small sample size (<100) and those that employed convenience  
498 sampling methods to reduce the bias; this review has also highlighted the importance of  
499 addressing the challenges and weaknesses in study design, analytical methods, and  
500 diagnostic criteria for micronutrient deficiencies, to ensure the validity and reliability of data in  
501 future study for interpretation. Nonetheless, this work also has some limitations. Firstly, all  
502 observational studies are limited by confounding and causality should not be inferred. Second,  
503 only 4 databases (Medline, Scopus, Embase and Cochrane) were searched, and only studies  
504 written in English were included, which may have limited the scope. Last and not least of all,  
505 MND status assessment is not trivial in humans, and the underlying studies included in this  
506 review were heterogeneous in the populations studied and approaches taken, conferring  
507 some limitations in data interpretation.

## 508 **SUMMARY**

509 Iron, zinc and vitamin A deficiencies were commonly associated with undernutrition in  
510 children and young people. Overnutrition increased the risk of iron deficiency, but not zinc or  
511 vitamin A deficiencies, with an inverted U-shaped relationship observed between iron status  
512 and bodyweight. Heterogeneity between studies was attributable to the diversity of  
513 participants, diagnostic criteria, and approaches to data analysis. Inflammation status was  
514 rarely adequately assessed, and we conclude the burden of iron deficiency may well be under-  
515 recognised, particularly in children and young people living with overnutrition.

## 516 **Author Contributions**

517 Conceptualization, X.T., P.Y.T., Y.Y.G., and J.B.M.; Data curation, formal analysis,  
518 investigation, and methodology, X.T. and P.Y.T.; Formal analysis, X.T. and P.Y.T.;  
519 Supervision, Y.Y.G., and J.B.M.; Validation, X.T. and P.Y.T.; Writing—original draft, X.T.;  
520 Writing—review and editing, X.T., P.Y.T., Y.Y.G., and J.B.M. All authors approved the final  
521 manuscript.

## 522 **Funding**

523 This research was funded by the project titled “Addressing micronutrient deficiencies  
524 associated with the double burden of childhood malnutrition in China, a combined food system  
525 framework; BB/T008989/1” from UK Biotechnology and Biological Sciences Research Council  
526 (BBSRC).

527

528 **FIGURES**

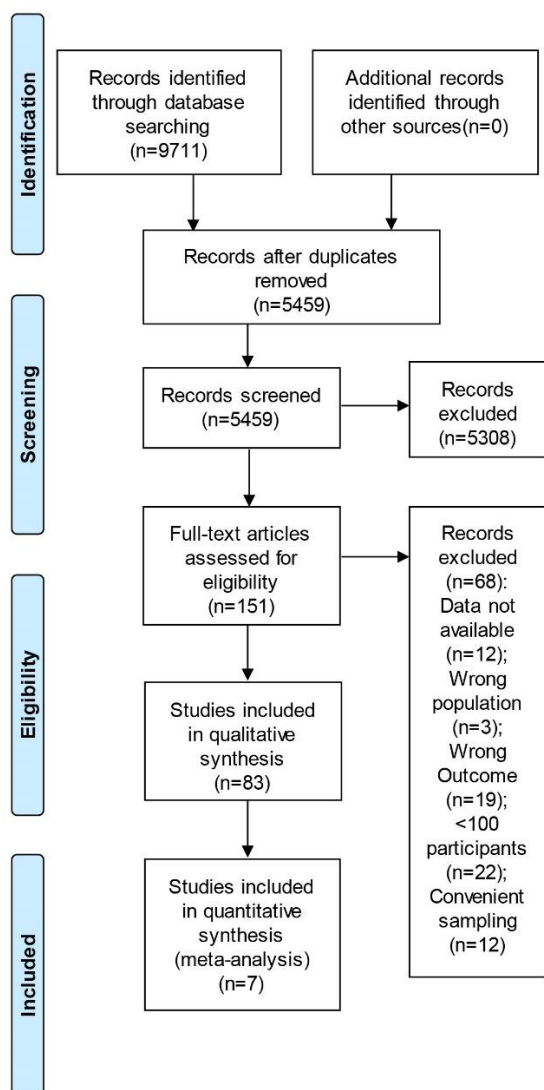

529

530 **Figure 1.** Flow diagram of the systematic identification and selection of articles.

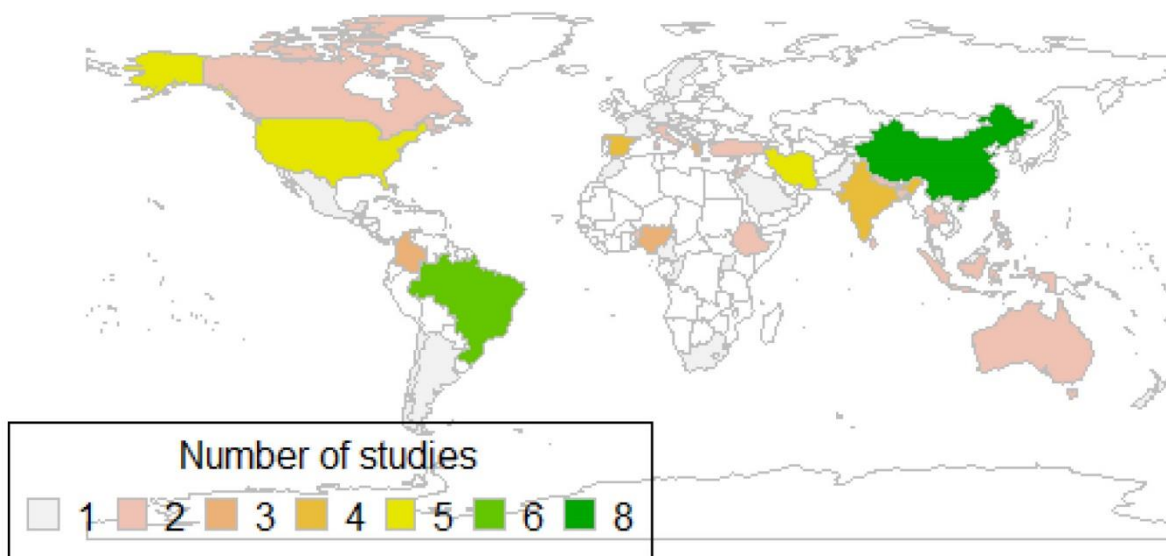

531

532 **Figure 2.** World map showing the populations represented in the included articles.

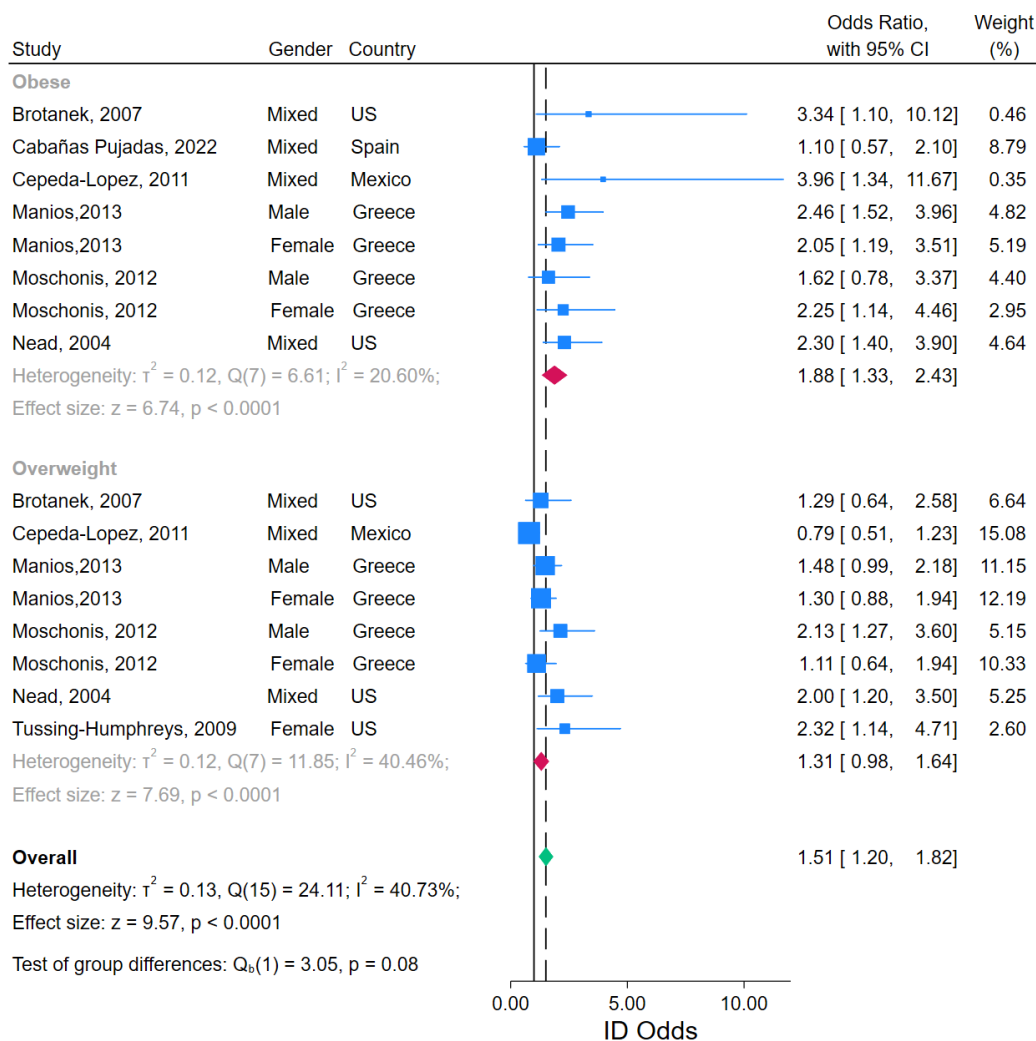

533

534 **Figure 3.** Forest plot of reported associations between overnutrition and odds of iron  
 535 deficiency. REML: Random effects restricted maximum likelihood; CI: confidence interval.

536

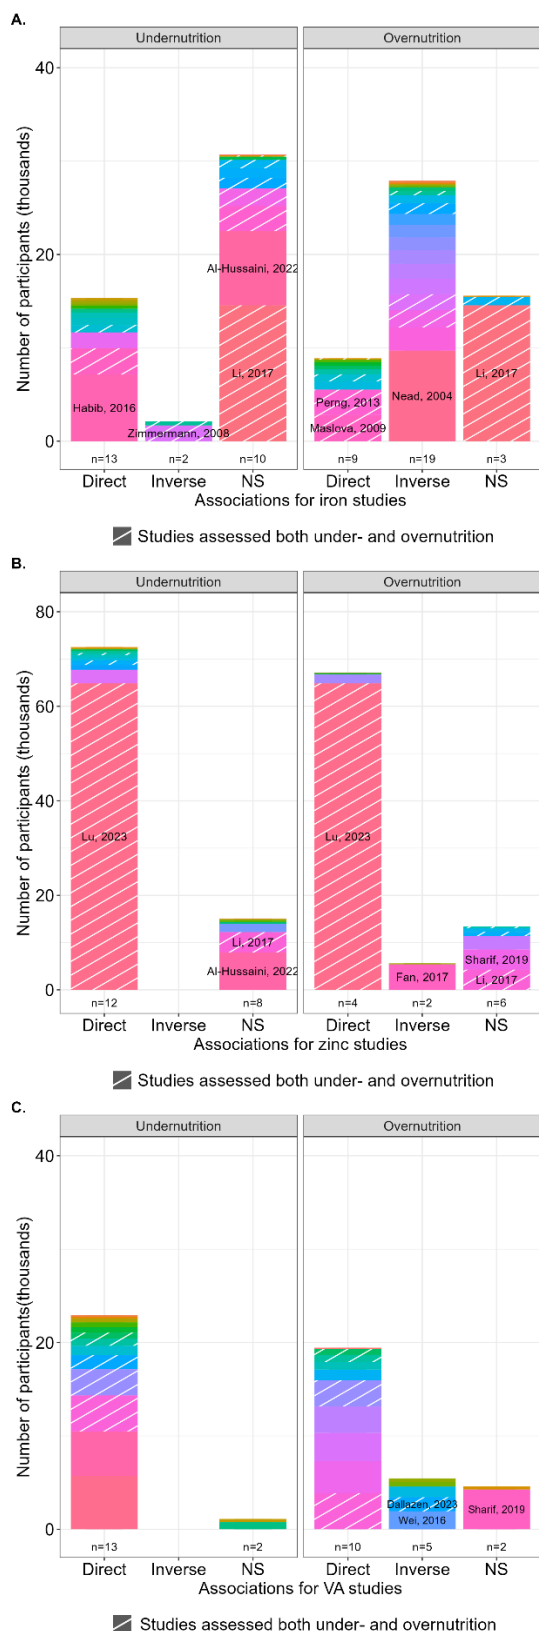

537

538 **Figure 4.** Summary stacked bar plots showing participant numbers, grouped by the direction  
 539 of associations, in studies examining overnutrition or undernutrition. **A.** Iron, **B.** Zinc, and **C.**  
 540 Vitamin A. Studies where participants represented >25% of the total population in each  
 541 category were labelled.

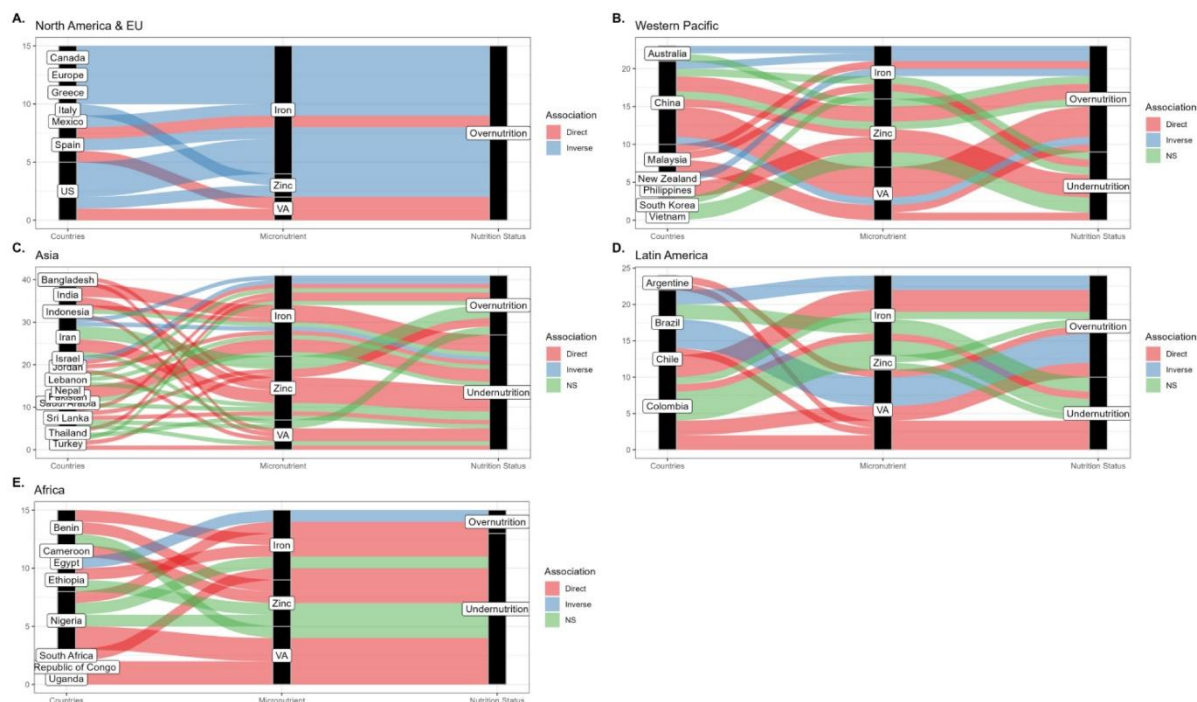

542  
543 **Figure 5.** Sankey plots illustrating regional differences in study characteristics and  
544 conclusions. **A.** North America and Europe, **B.** Western Pacific, **C.** Asia (excluding Western  
545 Pacific), **E.** Latin America, **F.** Africa. Each line represents a reported association for different  
546 micronutrient and nutritional status in different country. The size of each sub-columns  
547 represented the proportion of each category.  
548

## 549 TABLES

550 **Table 1.** Characteristics of studies (n=46) assessing the association between **iron** and under- and overnutrition.

| First Author, Year, Country             | Study Design, Participant (n), Age | Malnutrition and Biochemical Indicators <sup>1</sup>                                                       | Findings <sup>2</sup>                                                                                                              | Association   | Quality Rating |
|-----------------------------------------|------------------------------------|------------------------------------------------------------------------------------------------------------|------------------------------------------------------------------------------------------------------------------------------------|---------------|----------------|
| <b>Both (n=10)</b>                      |                                    |                                                                                                            |                                                                                                                                    |               |                |
| Cobayashi, 2013, Brazil <sup>28</sup>   | Cross-sectional, 1139, 0-10 y      | OW: BAZ>1; stunting<br>ID: SF<12µg/L (<5 y), <15µg/L (≥5 y), or sTfR>8.3mg/L                               | <b>Overnutrition:</b><br>BAZ↑ ID↑ OW/ID: PR= 1.64 (1.07, 2.53) for <5 y<br><b>Undernutrition:</b> NS                               | Inverse<br>NS | Positive       |
| El Khoury, 2020, Lebanon <sup>101</sup> | Cross-sectional, 903, 8-18 y       | BMI category<br>ID: SF<15ng/mL; CRP>10mg/L excluded                                                        | <b>Both over- and undernutrition:</b> NS                                                                                           | NS            | Positive       |
| Eftekhari, 2009, Iran <sup>54</sup>     | Cross-sectional, 431, 13-20 y      | BMI category<br>ID: SF<12µg/L, TS<16%                                                                      | <b>Both over- and undernutrition:</b><br>BMI↑ SF↓ β= -0.21 for girls with ID                                                       | Inverse       | Positive       |
| Li, 2017, Colombia <sup>67</sup>        | Cross-sectional, 14559, 1-17 y     | HAZ, BAZ<br>PF                                                                                             | <b>Both over- and undernutrition:</b> NS                                                                                           | NS            | Positive       |
| Maslova, 2009, Colombia <sup>79</sup>   | Cross-sectional, 2811, 5-12 y      | BAZ<br>ID: PF<15 or 30µg/L if CRP>10mg/L                                                                   | <b>Both over- and undernutrition:</b><br>PF↓ BAZ↓ ID/BAZ: β= -0.22 (-0.42, -0.03)                                                  | Direct        | Positive       |
| Onabanjo, 2014, Nigeria <sup>93</sup>   | Cross-sectional, 127, 10-19 y      | Underweight: BAZ<5 <sup>th</sup> centile<br>OW, OB: BAZ>85 <sup>th</sup> & 95 <sup>th</sup> centiles<br>SF | <b>Overnutrition:</b><br>BMI↑ SF↑ OW, OB: r= 0.505, 0.556 (male);<br>OW, OB: r= 0.782, 0.838 (female)<br><b>Undernutrition:</b> NS | Direct<br>NS  | Positive       |

|                                                |                                   |                                                                                                                                                                                       |                                                                                                                                                                                                       |                   |          |
|------------------------------------------------|-----------------------------------|---------------------------------------------------------------------------------------------------------------------------------------------------------------------------------------|-------------------------------------------------------------------------------------------------------------------------------------------------------------------------------------------------------|-------------------|----------|
| Perng, 2013, Colombia <sup>89</sup>            | Cohort study, 2714, 5-12y         | BAZ, HAZ<br>PF                                                                                                                                                                        | <b>Overnutrition:</b><br>BAZ↑ PF↑<br><b>Undernutrition:</b> NS                                                                                                                                        | Direct<br><br>NS  | Positive |
| Tan, 2023, Malaysia <sup>25</sup>              | Cross-sectional, 776, 7-11y       | BAZ, WAZ, HAZ, stunting<br>ID: SF<15µg/L; Anaemia: Hb<115g/L;<br>IDA: ID + Anaemia                                                                                                    | <b>Overnutrition:</b><br>BAZ↑ SF↑; WAZ↑ SF↑<br><b>Undernutrition:</b><br>SF↓ HAZ↓ ID/stunting COR= 2.4 (1.6, 3.7)<br>SF, Hb↓ HAZ↓ IDA/stunting AOR= 2.3 (1.2, 4.3)                                    | Direct            | Positive |
| Zhu, 2019, China <sup>90</sup>                 | Cross-sectional, 1866, 7-18 y     | BMI category (Working Group on Obesity in China)<br>SF, SI<br>ID: SI<45µg/dL                                                                                                          | <b>Overnutrition:</b><br>BMI↑ Prevalence of ID ↑ SI↓<br>BMI↑ SF↑<br><b>Undernutrition:</b> NS                                                                                                         | Inverse<br><br>NS | Positive |
| Zimmermann, 2008, Morocco, India <sup>55</sup> | Cross-sectional, 1688, 9.3±2.5y   | BAZ<br>SF, TfR<br>BIS (SF/TfR)                                                                                                                                                        | <b>Both over- and undernutrition:</b><br>BAZ↑ BIS↓ $y = -0.6256x + 3.194$ ; $\beta = -0.658$ (-0.466, -0.850)<br>BAZ↑ SF↑ $\beta = 1.873$ (1.587, 2.519)<br>BAZ↑ sTfR↑ $\beta = 1.873$ (1.587, 2.159) | Inverse           | Positive |
| <b>Overnutrition (n=21)</b>                    |                                   |                                                                                                                                                                                       |                                                                                                                                                                                                       |                   |          |
| Abd-El-Wahed, 2014, Egypt <sup>80</sup>        | Case-control, 120 (60+60), 6-12 y | NW, OB: BMI<85 <sup>th</sup> & >95 <sup>th</sup> centiles<br>ID: ≥2 abnormal parameters: MCV<76fL, TS<15%, SF<10µg/mL                                                                 | BMI↑ ID↑ ID/OB: COR= 7.09 (3.16, 15.92)                                                                                                                                                               | Inverse           | Positive |
| Brotanek, 2007, US <sup>46</sup>               | Cross-sectional, 1641, 1-3 y      | OW, OB: WHZ>85 <sup>th</sup> & 95 <sup>th</sup> centiles<br>ID: ≥2 abnormal parameters: TS<10%, SF<10µg/L, red blood cells EP>1.42µmol/L (1-2 y); <12%, 10µmol/L, and>1.24µmol/L (3y) | WHZ↑ ID↑ ID/OW: AOR= 3.34 (1.10, 10.12)                                                                                                                                                               | Inverse           | Positive |
| Cabañas Pujadas, 2022, Spain <sup>50</sup>     | Cohort study, 1347, 9 y           | OB: BAZ>2<br>SF, Serum transferrin, CRP<br>ID: TS<16%                                                                                                                                 | BAZ↑ TS↓ $\beta = -2.4$ (-4.6, -0.1)<br>BAZ↑ SF↑ $\beta = 13.9$ (7.2, 20.5)<br>BAZ↑ serum transferrin↑ $\beta = 12.0$ (3.9, 20.1)                                                                     | Inverse           | Positive |

|                                          |                                    |                                                                                                         |                                                                                                                                                                                                                      |         |          |
|------------------------------------------|------------------------------------|---------------------------------------------------------------------------------------------------------|----------------------------------------------------------------------------------------------------------------------------------------------------------------------------------------------------------------------|---------|----------|
| Cepeda-Lopez, 2011, Mexico <sup>49</sup> | Cross-sectional, 1174, 5-12 y      | OB, OW: BMI $\geq$ 1 & 2 SD<br>TIBC, CRP<br>ID: low SI or TIBC >36 $\mu$ g/L; TS<20%.                   | BMI $\uparrow$ ID $\uparrow$ ID/OB: AOR= 3.96 (1.34, 11.67)<br>BMI $\uparrow$ TIBC $\uparrow$ r= 0.04                                                                                                                | Inverse | Positive |
| Cheng, 2013, Australia <sup>91</sup>     | Cross-sectional, 114, 18-25 y      | BMI $\geq$ 27.5<br>SI, TS, SF                                                                           | <b>in OW/OB women</b><br>BMI $\uparrow$ SI $\downarrow$ $\beta$ = -0.379 (0.139)<br>BMI $\uparrow$ TS $\downarrow$ $\beta$ = -0.588 (0.222)<br>BMI $\uparrow$ SF $\uparrow$                                          | Inverse | Positive |
| de Araújo, 2022, Brazil <sup>103</sup>   | Cross-sectional, 104, 7-9 m        | WHZ<br>ID: Hb>11g/dL, ferritin<12 $\mu$ g/L if CRP $\leq$ 5mg/L, or 30 $\mu$ g/L if CRP>5mg/L           | WHZ $\uparrow$ ID $\uparrow$ WHZ/ID: AOR= 2.86 (1.38, 5.6);<br>BAZ, WHZ, WAZ $\uparrow$ , ferritin $\downarrow$                                                                                                      | Inverse | Neutral  |
| Ferrari, 2015, Europe <sup>392</sup>     | Cross-sectional, 876, 13.9-16 y    | Thinness: BMI<18; OW, OB: BMI>25 & 30<br>SF, sTfR, CRP                                                  | BMI $\uparrow$ SF $\uparrow$ male: $\beta$ = 0.055 (0.029, 0.082)<br>BMI $\uparrow$ sTfR $\uparrow$ female: $\beta$ = 0.017 (0.001, 0.033)<br>BMI $\uparrow$ CRP $\uparrow$                                          | Inverse | Positive |
| Grant, 2007, New Zealand <sup>113</sup>  | Cross-sectional, 416, 6-23 m       | BMI>16.5 & 18.5<br>ID: NHANES standard: $\geq$ 2 abnormal parameters: SF, TS and EP.                    | BMI $\uparrow$ ID $\uparrow$ BMI>18.5/ID: RR= 4.34 (1.08, 10.67) relative to BMI<16.5                                                                                                                                | Inverse | Positive |
| Higgins, 2020, Canada <sup>114</sup>     | Cross-sectional, 1332, 5.1-<19.0 y | NW, OW, OB: BMI>3 <sup>rd</sup> , 85 <sup>th</sup> & 97 <sup>th</sup> centiles<br>SI, serum transferrin | BMI $\uparrow$ serum transferrin $\uparrow$<br>$\beta$ :BMIz/transferrin: 0.061 (0.037, 0.085)<br>BMI $\uparrow$ SI $\downarrow$ BMIz/iron: $\beta$ = -0.768 (-1.31, -0.229) (male), -0.870 (-1.41- -0.329) (female) | Inverse | Positive |
| Kassem, 2022, Israel <sup>97</sup>       | Cross-sectional, 146, 10-12 y      | OW, OB: WHO standard<br>SF, TS<br>ID: SF<15 $\mu$ g/dL                                                  | BAZ $\uparrow$ prevalence of ID $\uparrow$<br>BAZ $\uparrow$ TS $\downarrow$ , SF $\uparrow$                                                                                                                         | Inverse | Positive |
| Manios, 2013, Greece <sup>51</sup>       | Cross-sectional, 2492, 9-13 y      | OW, OB (International Obesity Task Force)<br>ID:TS<16%<br>IDA: ID + Hb<120g/L                           | BMI $\uparrow$ ID, IDA $\uparrow$<br>OB/ID: AOR= 2.46 (1.52, 3.96) (male), AOR= 2.05 (1.19, 3.51) (female)<br>OB/IDA: AOR= 3.13 (1.01, 7.91) (male), AOR= 3.28 (1.15, 9.33) (female)                                 | Inverse | Positive |



|                                               |                                       |                                                                                                                    |                                                                                               |         |          |
|-----------------------------------------------|---------------------------------------|--------------------------------------------------------------------------------------------------------------------|-----------------------------------------------------------------------------------------------|---------|----------|
| Moschonis, 2012, Greece <sup>52</sup>         | Cross-sectional, 1493, 9-13 y         | OW, OB (International Obesity Task Force)<br>ID: TS < 16%<br>IDA: ID + Hb < 120g/L                                 | BMI↑ ID↑<br>OW/ID: AOR= 2.13 (1.27, 3.60) (male)<br>OB/ID: AOR= 2.25 (1.14, 4.46) (female)    | Inverse | Positive |
| Nead, 2004, US <sup>47</sup>                  | Cross-sectional, 9698, 2-16 y         | OW, OB: BMI > 85 <sup>th</sup> & 95 <sup>th</sup> centiles<br>ID: ≥ 2 abnormal parameters: TS, EP and SF           | BMI↑ ID↑<br>ID/OW: AOR= 2.0 (1.2, 3.5)<br>ID/OB: AOR= 2.3 (1.4, 3.9)                          | Inverse | Positive |
| Ortiz Perez, 2020, Spain <sup>94</sup>        | Cross-sectional, 405, 12-16 y         | OW, OB (International Obesity Task Force)<br>SF, CRP, sTfR, SI<br>elevated CRP were excluded.                      | BAZ↑ SF, CRP, sTfR↑ r= 0.14, r= 0.43, r= 0.17, respectively                                   | Direct  | Positive |
| Pompano, 2022, Chile <sup>95</sup>            | Cross-sectional, 518, 16-17 y         | OW, OB: WHO standard<br>SF                                                                                         | BAZ↑ SF↑ r= 0.12                                                                              | Direct  | Positive |
| Shattnawi, 2018, Jordan <sup>98</sup>         | Cross-sectional, 873, 14.6±1.0 y      | OW: BMIz: CDC standard<br>PF, elevated CRP were excluded.                                                          | BMI↑ PF↑                                                                                      | Direct  | Positive |
| Suteerajtrakool, 2021, Thailand <sup>96</sup> | Cross-sectional, 336, 6-12 y          | OW, OB: WHO standard<br>ID: ≥ 2 abnormal parameters: TS < 16%, SF < 15µg/mL, and sTfR > 5mg/L<br>IDA: ID + anaemia | BAZ↑ SF↑ r= 0.214;<br>BAZ↑ sTfR↑ r= 0.207;<br>BAZ↑ TS↓ r= -0.132;<br>BAZ↑ TIBC↑ r= 0.209      | Direct  | Neutral  |
| Sypes, 2018, Canada <sup>99</sup>             | Cross-sectional, 1607 children, 1-3 y | BMIz<br>ID: SF < 12µg/L<br>CRP > 10mg/L was excluded                                                               | BMI↑ ID, SF↑<br>BMIz/ID: AOR= 1.28 (1.10, 1.50)<br>BMIz/median SF: β= -0.062 (-0.093, -0.031) | Inverse | Positive |
| Thillan, 2021, Sri Lanka <sup>59</sup>        | Case-control, 324, 8-9 y              | OW, OB: WHO standard<br>SF                                                                                         | BMI↑ SF↑ in boys                                                                              | Direct  | Positive |

|                                                |                                |                                                                                                                                                                                     |                                                                                                                                          |         |          |
|------------------------------------------------|--------------------------------|-------------------------------------------------------------------------------------------------------------------------------------------------------------------------------------|------------------------------------------------------------------------------------------------------------------------------------------|---------|----------|
| Tussing-Humphreys, 2009, US <sup>48</sup>      | Cross-sectional, 210, 12-17 y  | Heavier weight: BMI $\geq$ 85 <sup>th</sup> centile<br>ID: $\geq$ 2 abnormal parameters: MCV $<$ 82fL for 12-14y and $<$ 85fL for 15-17y, free EP $>$ 70 $\mu$ g/dL and TS $<$ 16%. | BMI $\uparrow$ ID $\uparrow$ BMI $>$ 85 <sup>th</sup> /ID: AOR= 2.32 (1.14, 4.71)<br>BMI $\uparrow$ log SI $\downarrow$ $\beta$ = -0.004 | Inverse | Positive |
| Yalcin, 2019, Turkey <sup>60</sup>             | Case-control, 120, 6-10 y      | OW, OB: BAZ $>$ 1 & 2 SD<br>Whole blood iron                                                                                                                                        | NS                                                                                                                                       | NS      | Positive |
| <b>Undernutrition (n=15)</b>                   |                                |                                                                                                                                                                                     |                                                                                                                                          |         |          |
| Alofe, 2017, Benin <sup>115</sup>              | Cross-sectional, 647, 6-59 m   | Stunting<br>Anaemia: WHO standard<br>ID: SF adjusted by medical status at birth<br>IDA: anaemia + ID                                                                                | HAZ $\uparrow$ ID, IDA $\uparrow$<br>Stunting/ID: AOR= 2.17 (1.17, 4.02)<br>Stunting/IDA: AOR= 2.16 (1.05, 4.46)                         | Direct  | Positive |
| Al-Hussaini, 2022, Saudi Arabia <sup>116</sup> | Case-control, 7931, 6-16 y     | Thinness (wasting): BAZ $<$ -2SD<br>SI, SF                                                                                                                                          | NS                                                                                                                                       | NS      | Neutral  |
| Andre, 2017, Brazil <sup>117</sup>             | Cross-sectional, 457, 4-7 y    | HAZ<br>SF                                                                                                                                                                           | NS                                                                                                                                       | NS      | Positive |
| Chitekwe, 2022, Nepal <sup>118</sup>           | Cross-sectional, 1709, 6-59 m  | Stunting<br>ID: SF $<$ 12.0ug/L or StfR $>$ 8.3mg/L                                                                                                                                 | HAZ $\downarrow$ ID $\uparrow$<br>Stunting/ID (Ferritin): AOR= 1.61 (1.18, 2.18); Stunting/ID (StfR): AOR= 1.69 (1.20, 2.38)             | Direct  | Positive |
| Ernawati, 2021, Indonesia <sup>119</sup>       | Cross-sectional, 1008, 11-16 y | Stunting, severe stunting<br>SF                                                                                                                                                     | NS                                                                                                                                       | NS      | Positive |

|                                                       |                                  |                                                                                                                           |                                                                                                       |        |          |
|-------------------------------------------------------|----------------------------------|---------------------------------------------------------------------------------------------------------------------------|-------------------------------------------------------------------------------------------------------|--------|----------|
| Ghosh, 2012, Nepal <sup>120</sup>                     | Cross-sectional, 192, 6-10 y     | Stunting: HAZ<-1 SD<br>SF                                                                                                 | HAZ↑ SF↑ $\beta = 0.217$                                                                              | Direct | Negative |
| Habib, 2016, Pakistan <sup>121</sup>                  | Cross-sectional, 7138, 6-59 m    | Stunting, Underweight: WAZ<-2 SD<br>IDA: Hb<110g/L, SF<12 $\mu$ g/L<br>Hb adjusted for altitudes                          | HAZ↓ IDA↑ stunting/IDA: AOR= 1.42 (1.23, 1.63)<br>WAZ↓ IDA↑ underweight/IDA COR= 1.28 (1.15, 1.43)    | Direct | Positive |
| Indriastuti Kurniawan, 2006, Indonesia <sup>122</sup> | Cross-sectional, 133, 10-12 y    | Thinness: BAZ<-2 SD<br>Anaemia: Hb<120g/L<br>IDA: Anaemia + SF<12 $\mu$ g/L,<br>sTfR>8.5mg/L, ZnPP>40 $\mu$ mol/mol heme. | <b>Comparing with female patients with anaemia:</b><br>BAZ↓ IDA↑ thinness/IDA: AOR= 5.1 (1.34, 19.00) | Direct | Negative |
| Khatib, 2009, Jordan <sup>123</sup>                   | Cross-sectional, 560, 5.5-10 y   | Stunting<br>SF                                                                                                            | HAZ↓ SF↓                                                                                              | Direct | Positive |
| Kumari, 2022, India <sup>124</sup>                    | Case-control, 202, 1-5 y         | WHZ, BAZ<br>SI                                                                                                            | WHZ↑ SI↑<br>BMI↑ SI↑ r= 0.301                                                                         | Direct | Positive |
| Matsungo, 2017, South Africa <sup>125</sup>           | Cross-sectional, 750, 0-6 m      | Stunting: LAZ<-2 SD<br>Anaemia: Hb<110g/L<br>ID: sTfR>8.3mg/L; IDA: ID + anaemia                                          | LAZ↓ ID↑, IDA↑                                                                                        | Direct | Positive |
| Orsango, 2021, Ethiopia <sup>126</sup>                | Cross-sectional, 331, 2-5 y      | HAZ, WHZ<br>IDA: Hb <110g/L, adjusted SF<12 $\mu$ g/L                                                                     | HAZ ↑ IDA↓ HAZ/IDA: AOR= 0.74 (0.56, 0.98)                                                            | Direct | Positive |
| Park, 2012, South Korea <sup>41</sup>                 | Cross-sectional, 101, 11.1±2.0 m | HAZ, WAZ, WHZ<br>ID: SF<12ng/mL and/or TS<15%                                                                             | NS                                                                                                    | NS     | Positive |

|                                    |                             |                                         |                                                  |        |          |
|------------------------------------|-----------------------------|-----------------------------------------|--------------------------------------------------|--------|----------|
| Sethy, 2014, India <sup>45</sup>   | Cross-sectional, 144, 2-5 y | Underweight: WAZ<-2SD<br>Stunting<br>SI | WHZ↓ SI↓ (mean level, but r= -0.175)<br>HAZ↓ SI↓ | Direct | Negative |
| Shukla, 2023, India <sup>127</sup> | Case-control, 442, 6-60 m   | SAM: MUAC<11.5cm<br>SF                  | MUAC↓ SF↓                                        | Direct | Neutral  |

551 <sup>1</sup>Stunting refers to HAZ<-2 SD unless noted

552 <sup>2</sup>OR shown as OR (95%CI) unless noted;  $\beta$  coefficient shown as  $\beta$  (95%CI) unless noted

553 Abbreviations:

554 AOR: adjusted odds ratio; BAZ: BMI-age z score; BIS: body iron store; BMI: body mass index; COR: crude odds ratio; CRP: C-reaction protein; HAZ: height-  
555 for-age z score; Hb: haemoglobin; fL: femtoliter; ID: iron deficiency; IDA: iron deficiency anaemia; EP: erythrocyte protoporphyrin, NW: normal weight; NS: not  
556 significant; MCV: mean corpuscular volume; OB: obese; OR: odds ratio; OW: overweight; PF: plasma ferritin; PR: prevalence ratio; SF: serum ferritin; SI:  
557 serum iron; sTfR: serum transferrin receptor; TfR: transferrin receptor; TS: transferrin saturation; WAZ: weight-for-age z score; WHO: World Health  
558 Organization; WHZ: weight-for-height z score; SAM: severe acute malnutrition; ZnPP: zinc protoporphyrin.

559

560 **Table 2** Characteristics of the studies (n=28) assessing the association between **zinc** and weight status.

| First Author, Year, Country        | Study Design, Participant (n), age              | Malnutrition and Biochemical Indicators <sup>1</sup>         | Significant findings <sup>2</sup>                                                                                                                                                                          | Association  | Quality Rating |
|------------------------------------|-------------------------------------------------|--------------------------------------------------------------|------------------------------------------------------------------------------------------------------------------------------------------------------------------------------------------------------------|--------------|----------------|
| <b>Both (n=4)</b>                  |                                                 |                                                              |                                                                                                                                                                                                            |              |                |
| Dehghani, 2011, Iran <sup>64</sup> | Cross-sectional, 902, 3-18 y                    | Wasting, stunting, BMI percentiles<br>Serum Zn               | <b>Overnutrition:</b> NS<br><b>Undernutrition:</b><br>Serum Zn↓ prevalence of mild wasting, stunting ↑                                                                                                     | NS<br>Direct | Positive       |
| Habib, 2022, Iran <sup>65</sup>    | Cross-sectional, 454, 2-18 y                    | BMI percentiles, HAZ<br>Serum Zn                             | <b>Overnutrition:</b> NS<br><b>Undernutrition:</b><br>HAZ ↓ Serum Zn↓                                                                                                                                      | NS<br>Direct | Positive       |
| Li, 2017, Colombia <sup>67</sup>   | Cross-sectional, 4279, 1-17 y                   | HAZ, BAZ<br>Serum Zn                                         | <b>Both over- and undernutrition:</b> NS                                                                                                                                                                   | NS           | Positive       |
| Lu, 2023, China <sup>42</sup>      | Cross-sectional, 64850, 6-18 y                  | Stunting: WS/T 456-2014<br>OW, OB: WS/T 586-2018<br>Serum Zn | <b>Overnutrition:</b><br>BMI↑ ZD↓ ZD/OW: AOR= 0.881 (0.808, 0.960);<br>ZD/OB: AOR= 0.776 (0.702, 0.857)<br><b>Undernutrition:</b><br>HAZ↓ ZD↑ AOR= 1.443 (1.19, 1.75)                                      | Direct       | Positive       |
| <b>Overnutrition (n=8)</b>         |                                                 |                                                              |                                                                                                                                                                                                            |              |                |
| Fan, 2017, US <sup>62</sup>        | Cross-sectional, 5404, 6-19 y                   | OW, OB: BMI percentiles<br>Serum Zn (vs Q1)                  | Serum Zn↑ BMI↓<br>Serum Zn Q4/OW: AOR= 0.65 (0.47, 0.89)<br>Serum Zn Q3/OB: AOR= 0.62 (0.41, 0.92)<br>(Serum Zn-BMI) male: $\beta$ = -0.161 (-0.315, -0.007),<br>female: $\beta$ = -0.184 (-0.343, -0.025) | Inverse      | Positive       |
| Ho, 2017, Australia <sup>68</sup>  | Cross-sectional, 726, 8 y (n=436), 15 y (n=290) | OW, OB (BMI z scores)<br>Plasma Zn                           | NS                                                                                                                                                                                                         | NS           | Positive       |
| Perrone, 1998, Italy <sup>63</sup> | Case-control, 207 (143+164), 4-16 y             | OB: BMI>95 <sup>th</sup> centile<br>Serum Zn                 | BMI↑ Serum Zn↓                                                                                                                                                                                             | Inverse      | Neutral        |

|                                                |                                    |                                                                    |                                                                                                     |        |          |
|------------------------------------------------|------------------------------------|--------------------------------------------------------------------|-----------------------------------------------------------------------------------------------------|--------|----------|
| Sharif, 2019, Iran <sup>66</sup>               | Cross-sectional, 4261, 15-23 m     | OW: BAZ $\geq$ 1 SD<br>Quartiles of Zn levels (vs Q1);             | NS                                                                                                  | NS     | Positive |
| Thillan, 2021, Sri Lanka <sup>59</sup>         | Case-control, 324, 8-9 y           | OW, OB: WHO standard<br>Serum Zn                                   | BMI $\uparrow$ Serum Zn $\uparrow$ (male)                                                           | Direct | Positive |
| Yalcin, 2019, Turkey <sup>60</sup>             | Case-control, 120 (40+80), 6-10 y  | OW, OB: BAZ $>$ 1 & 2 SD<br>Whole blood Zn                         | BMI $\uparrow$ Whole blood Zn $\uparrow$                                                            | Direct | Positive |
| Zhu, 2021, China <sup>61</sup>                 | Cross-sectional, 3241, 6-17 y      | OW, OB: BMI (WS/T 586—<br>2018)<br>Quartiles of Zn levels (vs Q1); | Serum Zn $\uparrow$ BMI $\uparrow$                                                                  | Direct | Positive |
| Zou, 2022, China <sup>69</sup>                 | Cross-sectional, 2818, 6-17 y      | OW, OB: BMI (WS/T 586—<br>2018)<br>Serum Zn                        | NS                                                                                                  | NS     | Positive |
| <b>Undernutrition (n=16)</b>                   |                                    |                                                                    |                                                                                                     |        |          |
| Al-Hussaini, 2022, Saudi Arabia <sup>116</sup> | Case-control, 7931, 6-16 y         | Thinness(wasting): BAZ $<$ -<br>2SD<br>Serum Zn                    | NS                                                                                                  | NS     | Neutral  |
| Engle-Stone, 2014, Cameroon <sup>128</sup>     | Cross-sectional, 817, 12-59 m      | HAZ, WHZ<br>Plasma Zn                                              | HAZ, WHZ $\downarrow$ Plasma Zn $\downarrow$                                                        | Direct | Positive |
| Galetti, 2016, Benin <sup>129</sup>            | Cross-sectional, 598, 1-10 y       | HAZ<br>Plasma Zn                                                   | Plasma Zn $\uparrow$ HAZ $\uparrow$<br>HAZ/Plasma Zn: $\beta$ = 0.15 (SE= 0.06)                     | Direct | Neutral  |
| Gibson, 2007, Thailand <sup>130</sup>          | Case-control, 230 (58+172), 6-13 y | Stunting<br>Serum Zn                                               | NS                                                                                                  | NS     | Positive |
| Goyena, 2021, Philippine <sup>26</sup>         | Cross-sectional, 2892, 6-71 m      | Stunting<br>ZD: IZINCG standard                                    | HAZ $\downarrow$ ZD $\uparrow$<br>ZD/stunting: AOR= 1.36 (1.06, 1.76)                               | Direct | Positive |
| Kongsbak, 2006, Bangladesh <sup>131</sup>      | Cross-sectional, 579, 3-7 y        | Stunting<br>Serum Zn                                               | HAZ $\downarrow$ Serum Zn $\downarrow$ stunting was associated with 0.2 $\mu$ mol/L lower Serum Zn. | Direct | Positive |
| Kumari, 2022,                                  | Case-control, 202,                 | WHZ, BAZ<br>Serum Zn                                               | BMI $\uparrow$ Serum Zn $\uparrow$ r= 0.201<br>WHZ $\uparrow$ Serum Zn $\uparrow$                   | Direct | Positive |

|                                                    |                                  |                                                                                                                      |                                                                                                       |        |          |
|----------------------------------------------------|----------------------------------|----------------------------------------------------------------------------------------------------------------------|-------------------------------------------------------------------------------------------------------|--------|----------|
| India <sup>124</sup>                               | 1-5 y                            |                                                                                                                      |                                                                                                       |        |          |
| Marashinghe, 2015, Sri Lanka <sup>132</sup>        | Cross-sectional, 340, 2-5 y      | Underweight: WAZ<-2 SD, stunting, wasting/thinness: WHZ<-2 SD<br>Serum Zn                                            | HAZ↑ Serum Zn↑ severe stunting vs. normal<br>WAZ↑ Serum Zn↑ severe underweight vs. normal             | Direct | Neutral  |
| Nasiri-Babadi, 2021, Iran <sup>133</sup>           | Cross-sectional, 425, 5-7 y      | Wasting (BAZ<-1)<br>Serum Zn, tertiles of Zn levels (vs T1)                                                          | Serum Zn↑ weight, BAZ↑<br>Wasting/Zn T3: AOR= 0.53 (0.31, 0.91)                                       | Direct | Positive |
| Naupal-Forcadilla, 2017, Philippines <sup>56</sup> | Cross-sectional, 149, 2-3 y      | HAZ<br>ZD: IZiNCG standard                                                                                           | HAZ↑ ZD↓ HAZ/ZD: AOR= 0.86 (0.78, 0.96)<br>ZD was less likely to occur among children with normal HAZ | Direct | Positive |
| Okafor, 2021, Nigria <sup>134</sup>                | Cross-sectional, 380, 6-12 y     | Stunting<br>Serum Zn<br>ZD: serum Zn<80µg/dL                                                                         | NS                                                                                                    | NS     | Neutral  |
| Park, 2012, South Korea <sup>41</sup>              | Cross-sectional, 101, 6-24 m     | HAZ, WAZ, WHZ: <-1 SD<br>Hypozaemia: serum Zn<70µg/dL                                                                | NS                                                                                                    | NS     | Positive |
| Sethy, 2014, India <sup>45</sup>                   | Cross-sectional, 144, 2-5 y      | Stunting, wasting: WHZ<-2 SD<br>Serum Zn                                                                             | HAZ↓ Serum Zn↓ (mean level, but r= -0.193);<br>WHZ↓ Serum Zn↓ (mean level, but r= -0.278)             | Direct | Negative |
| Tessema, 2019, Ethiopia <sup>102</sup>             | Cross-sectional, 1776, 6-59 m    | HAZ, WAZ<br>Serum Zn, adjusted by CRP, AGP                                                                           | NS                                                                                                    | NS     | Positive |
| Van Nhien, 2009, Vietnam <sup>135</sup>            | Cross-sectional, 245, 11-17 y    | BMI<17<br>Serum Zn                                                                                                   | NS                                                                                                    | NS     | Positive |
| Yazbeck, 2016, Lebanon <sup>136</sup>              | Case-control, 161(78+83), 1-10 y | FTT: WAZ<5 <sup>th</sup> centile;<br>Short stature: HAZ<-2 SD or <2.5 <sup>th</sup> centile<br>ZD: Plasma Zn<65µg/dL | NS                                                                                                    | NS     | Positive |

<sup>1</sup>Stunting refers to HAZ<-2 SD, severe stunting refers to HAZ<-3SD unless specific noted.

<sup>2</sup>OR were shown as OR (95%CI) unless specific noted; β coefficient were shown as β (95%CI) unless specific noted. NS: not significant.

AGP: α-acid glycoprotein; AOR: adjusted odds ratio; AOR: adjusted odds ratio; BAZ: BMI-age z score; BMI: body mass index; CRP: C-reaction protein; FTT: Failure to thrive; HAZ: height-for-age z score; IZiNCG: International Zinc Nutrition Consultative Group; MUAC: mid-upper arm circumference; OB: obese; OR: odds ratio; OW: overweight; SE: standard error; WAZ: weight-for-age z score; WHZ: weight-for-height z score; Zn: zinc; zinc deficiency: ZD.

562 **Table 3.** Characteristics of the studies (n=27) assessing the association between **vitamin A** and weight status.

| First Author, Year, Country            | Study Design, Participant (n), age | Malnutrition and Biochemical Indicators <sup>1</sup>                                        | Significant findings <sup>2</sup>                                                                                                             | Association           | Quality Rating |
|----------------------------------------|------------------------------------|---------------------------------------------------------------------------------------------|-----------------------------------------------------------------------------------------------------------------------------------------------|-----------------------|----------------|
| <b>Both (n=5)</b>                      |                                    |                                                                                             |                                                                                                                                               |                       |                |
| Dallazen, 2023, Brazil <sup>83</sup>   | Cross-sectional, 1503, 12-59 m     | HAZ, BAZ<br>VAD: plasma retinol<0.7µmol/L                                                   | <b>Overnutrition:</b><br>BAZ↑ plasma retinol↓<br><b>Undernutrition:</b><br>HAZ↓ VAD↑ APR= 4.75 (2.10, 10.73) plasma retinol↓                  | Inverse<br><br>Direct | Positive       |
| Disalvo, 2019, Argentina <sup>78</sup> | Cross-sectional, 624, 1-6 y        | WAZ, BMIz<br>Serum retinol                                                                  | <b>Overnutrition:</b> BMIz↑ Serum VA↑<br><b>Undernutrition:</b><br>WAZ↓ Serum retinol↓                                                        | Direct                | Positive       |
| Li, 2017, Colombia <sup>67</sup>       | Cross-sectional, 3844, 1-17 y      | HAZ, BAZ<br>Serum VA                                                                        | <b>Both under- and overnutrition:</b><br>BAZ↑ Serum VA↑                                                                                       | Direct                | Positive       |
| Maslova, 2009, Colombia <sup>79</sup>  | Cross-sectional, 2811, 5-12 y      | BAZ<br>Plasma retinol                                                                       | <b>Both under- and overnutrition:</b><br>Plasma retinol↑ BAZ↑                                                                                 | Direct                | Positive       |
| Tan, 2023, Malaysia <sup>25</sup>      | Cross-sectional, 776, 7-11 y       | BAZ, HAZ, WAZ<br>VAD: Both plasma retinol and RBP<0.7µmol/L                                 | <b>Overnutrition:</b><br>BAZ↑ retinol, RBP↑; WAZ↑ retinol, RBP↑<br><b>Undernutrition:</b><br>Serum VA↓ HAZ↓ VAD/stunting: COR= 2.9 (1.8, 4.7) | Direct                | Positive       |
| <b>Overnutrition (n=12)</b>            |                                    |                                                                                             |                                                                                                                                               |                       |                |
| Cobayashi, 2013, Brazil <sup>28</sup>  | Cross-sectional, 582, 0-10 y       | OW: BAZ>1<br>VAD: plasma VA<20µg/dL                                                         | OW↑ VAD↑ PR= 1.97 (1.13, 3.41) for ≥5y                                                                                                        | Inverse               | Positive       |
| de Souza Valente da Silva,             | Cross-sectional, 471, 7-17 y       | OW, OB: BMI>85 <sup>th</sup> & 95 <sup>th</sup> centiles<br>Low serum carotenoids:<40 µg/dL | BMI↑ serum carotenoids↓ r= -0.192<br>BMI/low serum carotenoids: β= 0.92, AOR= 2.51 (1.43, 4.39)                                               | Inverse               | Positive       |



|                                                       |                                        |                                                                                                                 |                                                                                                                                             |         |          |
|-------------------------------------------------------|----------------------------------------|-----------------------------------------------------------------------------------------------------------------|---------------------------------------------------------------------------------------------------------------------------------------------|---------|----------|
| 2007,<br>Brazil <sup>81</sup>                         |                                        |                                                                                                                 |                                                                                                                                             |         |          |
| Gunanti,<br>2014,<br>US <sup>73</sup>                 | Cross-sectional,<br>1154,<br>8-15 y    | OW, OB: BMI>85 <sup>th</sup> & 95 <sup>th</sup><br>centiles<br>Serum retinol and quartiles                      | BMI↑ serum retinol↑ $\beta = 5.56 (3.36, 7.75)$<br>OW/retinol quartile: AOR= 2.01(1.26, 3.22)<br>OB/retinol quartile: AOR= 2.90(1.65, 5.09) | Direct  | Positive |
| Hu,<br>2001,<br>China <sup>74</sup>                   | Cross-sectional,<br>793,<br>0-19 y     | BMI<br>Serum VA                                                                                                 | BMI↑ VA↑ $r = 0.26, \beta = 4.32 \pm 0.93$<br>Weight↑ VA↑ $r = 0.37, \beta = 10.39 \pm 1.85$                                                | Direct  | Positive |
| Ortega-<br>Senovilla,<br>2019,<br>Spain <sup>75</sup> | Case-control,<br>141 (70+71),<br>6-8 y | OB (Cole et al, 2000)<br>Plasma all-trans-retinol                                                               | BMI↑ plasma retinol↑                                                                                                                        | Direct  | Neutral  |
| Paes-Silva,<br>2018,<br>Brazil <sup>82</sup>          | Cross-sectional,<br>411,<br>12-19 y    | OW: BAZ>1;<br>Low $\beta$ -carotene: Serum $\beta$ -<br>carotene <0.9 $\mu$ mol/L                               | BAZ↑ $\beta$ -carotene↓<br>Low $\beta$ -carotene/OW, PR= 1.46 (1.2, 1.8) (male)<br>Low $\beta$ -carotene/NW, PR= 1.19 (1.0, 1.4) (female)   | Inverse | Positive |
| Sharif,<br>2019,<br>Iran <sup>66</sup>                | Cross-sectional,<br>4261,<br>15-23 m   | OW: BAZ>1<br>Quartiles of retinol levels (vs Q1)                                                                | NS                                                                                                                                          | NS      | Positive |
| Thillan,<br>2021,<br>Sri Lanka <sup>59</sup>          | Case-control,<br>324,<br>8-9 y         | OW; OB: WHO standard<br>Serum VA                                                                                | NS                                                                                                                                          | NS      | Positive |
| Tian,<br>2022,<br>China <sup>76</sup>                 | Cross-sectional,<br>3025,<br>7-17 y    | General OB: WS/T 586-2018<br>Central OB: WC≥90 <sup>th</sup> centile<br>Quartiles of Serum VA levels (vs<br>Q1) | serum VA↑ general OB↑ Q4/general OB: AOR= 4.10<br>(2.88, 5.85)<br>serum VA↑ central OB↑ Q4/central OB: AOR= 4.14<br>(3.07, 5.56)            | Direct  | Positive |
| Wei,<br>2016,<br>China <sup>84</sup>                  | Cross-sectional,<br>1928,<br>7-11 y    | OB: BMI>95 <sup>th</sup> centile<br>VAD: Serum VA <20 $\mu$ g/dL                                                | BMI↑ VAD/OB: AOR= 2.37 (1.59, 3.55)<br>BMI↑ Serum VA↓                                                                                       | Inverse | Positive |
| Yang,<br>2015,<br>China <sup>77</sup>                 | Cross-sectional,<br>3457,<br>7-17 y    | OW, OB: BMI>85 <sup>th</sup> & 95 <sup>th</sup><br>centiles<br>VAD: serum retinol<30 $\mu$ g/dL                 | BMI↑ serum retinol↑<br>VAD/NW: AOR= 1.34 (1.10, 1.63), $\beta = 0.29$                                                                       | Direct  | Positive |
| Zou,<br>2022,                                         | Cross-sectional,<br>2818               | OW; OB: WS/T 586-2018<br>VAI: Serum VA 20-30 $\mu$ g/dL;                                                        | serum VA↑ BMI↑<br>sufficient VA/OW: AOR= 1.55 (1.19, 2.02)                                                                                  | Direct  | Positive |

|                                             |                                       |                                                                        |                                 |        |          |
|---------------------------------------------|---------------------------------------|------------------------------------------------------------------------|---------------------------------|--------|----------|
| China <sup>69</sup>                         | 6-17 y                                | VAD: Serum VA<20µg/dL                                                  |                                 |        |          |
| <b>Undernutrition (n=10)</b>                |                                       |                                                                        |                                 |        |          |
| Adamu, 2016, Nigeria <sup>137</sup>         | Case-control, 550 (275+275), 6 m-5 y  | WHZ<br>Serum retinol                                                   | WHZ↓ Serum VA↓                  | Direct | Neutral  |
| Ahmed, 2006, Bangladesh <sup>138</sup>      | Cross-sectional, 381, 11-16 y         | BMI<br>Serum VA                                                        | BMI↓ Serum VA↓ r= 0.33, β= 0.26 | Direct | Positive |
| Alaofe, 2017, Benin <sup>115</sup>          | Cross-sectional, 647 children, 6-59 m | Stunting<br>VAD: serum retinol<20µg/dL, corrected by infection         | NS                              | NS     | Positive |
| Ernawati, 2021, Indonesia <sup>119</sup>    | Cross-sectional, 1008, 11-16 y        | Stunting; severe stunting<br>Serum retinol                             | HAZ↓ serum retinol↓             | Direct | Positive |
| Khatib, 2009, Jordan <sup>123</sup>         | Cross-sectional, 560, 5.5-10 y        | BMI; stunting<br>Serum VA                                              | BMI↓ serum VA↓ r= 0.114         | Direct | Positive |
| Kurugol, 2000, Turkey <sup>139</sup>        | Cross-sectional, 160, 6-59 m          | Stunting<br>Serum retinol                                              | HAZ↓ Serum retinol↓             | Direct | Neutral  |
| Marashinghe, 2015, Sri Lanka <sup>132</sup> | Cross-sectional, 340, 2-5 y           | Underweight: WAZ<-2; stunting;<br>wasting/thinness: WHZ<-2<br>Serum VA | NS                              | NS     | Neutral  |
| Oso, 2003, Nigeria <sup>140</sup>           | Cross-sectional, 213, 6 m-6 y         | Stunting<br>Serum retinol                                              | HAZ↓ serum retinol↓             | Direct | Negative |
| Samba, 2006, Congo <sup>141</sup>           | Cross-sectional, 5722, 0-71 m         | WHZ <-2 SD<br>Serum retinol                                            | WHZ↓ Serum retinol↓             | Direct | Positive |

|                                       |                               |                                                                   |                                                                                                  |        |          |
|---------------------------------------|-------------------------------|-------------------------------------------------------------------|--------------------------------------------------------------------------------------------------|--------|----------|
| Ssentongo, 2020, Uganda <sup>27</sup> | Cross-sectional, 4765, 6–59 m | Stunting; severe stunting<br>VAD: RBP<0.83μmol/L, adjusted by CRP | RBP↓ HAZ↓<br>VAD/stunting: AOR= 1.43 (1.08, 1.89)<br>VAD/severe stunting: AOR= 1.64 (1.14, 2.35) | Direct | Positive |
|---------------------------------------|-------------------------------|-------------------------------------------------------------------|--------------------------------------------------------------------------------------------------|--------|----------|

<sup>1</sup>Stunting refers to HAZ<-2 SD, severe stunting refers to HAZ<-3SD unless specific noted.

<sup>2</sup>OR were shown as OR (95%CI) unless specific noted; β coefficient were shown as β (95%CI) unless specific noted.

AOR: adjusted odds ratio; BAZ: BMI-age z score; BMI: body mass index; CRP: C-reaction protein; HAZ: height-for-age z score; NS: not significant; NW: normal weight; OB: obese; OR: odds ratio; OW: overweight; RBP: retinol binding protein; VAD: vitamin A deficiency; WAZ: weight-for-age z score; WHZ: weight-for-height z score.

563

564

565 References

- 566 1. Bailey RL, West Jr KP, Black RE. The Epidemiology of Global Micronutrient Deficiencies.  
567 *Ann Nutr Metab* 2015;66(suppl 2):22-33. doi: 10.1159/000371618
- 568 2. Black RE, Victora CG, Walker SP, et al. Maternal and child undernutrition and overweight  
569 in low-income and middle-income countries. *The Lancet* 2013;382(9890):427-51. doi:  
570 10.1016/S0140-6736(13)60937-X
- 571 3. Tam E, Keats EC, Rind F, et al. Micronutrient Supplementation and Fortification  
572 Interventions on Health and Development Outcomes among Children Under-Five in  
573 Low- and Middle-Income Countries: A Systematic Review and Meta-Analysis.  
574 *Nutrients* 2020;12(2):289.
- 575 4. da Silva Lopes K, Yamaji N, Rahman MO, et al. Nutrition-specific interventions for  
576 preventing and controlling anaemia throughout the life cycle: an overview of  
577 systematic reviews. *Cochrane Database Syst Rev* 2021;9(9):Cd013092. doi:  
578 10.1002/14651858.CD013092.pub2 [published Online First: 20210926]
- 579 5. Stevens GA, Beal T, Mbuya MNN, et al. Micronutrient deficiencies among preschool-aged  
580 children and women of reproductive age worldwide: a pooled analysis of individual-  
581 level data from population-representative surveys. *Lancet Glob Health*  
582 2022;10(11):e1590-e99. doi: [https://doi.org/10.1016/S2214-109X\(22\)00367-9](https://doi.org/10.1016/S2214-109X(22)00367-9)
- 583 6. Yue T, Zhang Q, Li G, et al. Global Burden of Nutritional Deficiencies among Children  
584 under 5 Years of Age from 2010 to 2019. *Nutrients* 2022;14(13):2685.
- 585 7. Camaschella C. Iron deficiency. *Blood* 2019;133(1):30-39. doi: 10.1182/blood-2018-05-  
586 815944
- 587 8. Gupta S, Brazier AKM, Lowe NM. Zinc deficiency in low- and middle-income countries:  
588 prevalence and approaches for mitigation. *J Hum Nutr Diet* 2020;33(5):624-43. doi:  
589 10.1111/jhn.12791 [published Online First: 20200706]
- 590 9. Belay A, Gashu D, Joy EJM, et al. Zinc deficiency is highly prevalent and spatially  
591 dependent over short distances in Ethiopia. *Sci Rep* 2021;11(1):6510. doi:  
592 10.1038/s41598-021-85977-x [published Online First: 20210322]
- 593 10. Laillou A, Pham TV, Tran NT, et al. Micronutrient deficits are still public health issues  
594 among women and young children in Vietnam. *PLoS One* 2012;7(4):e34906. doi:  
595 10.1371/journal.pone.0034906 [published Online First: 20120417]
- 596 11. Sahile Z, Yilma D, Tezera R, et al. Prevalence of Vitamin A Deficiency among Preschool  
597 Children in Ethiopia: A Systematic Review and Meta-Analysis. *Biomed Res Int*  
598 2020;2020:8032894. doi: 10.1155/2020/8032894 [published Online First: 20200227]
- 599 12. Van Nhien N, Khan NC, Ninh NX, et al. Micronutrient deficiencies and anemia among  
600 preschool children in rural Vietnam. *Asia Pac J Clin Nutr* 2008;17(1):48-55.
- 601 13. Organization WH. [updated 2023. Available from: [https://www.who.int/health-](https://www.who.int/health-topics/malnutrition#tab=tab_1)  
602 [topics/malnutrition#tab=tab\\_1](https://www.who.int/health-topics/malnutrition#tab=tab_1) accessed 1003 2023.
- 603 14. Alderman H, Behrman JR, Glewwe P, et al. Evidence of Impact of Interventions on  
604 Growth and Development during Early and Middle Childhood. In: Bundy DAP, Silva  
605 ND, Horton S, et al., eds. *Child and Adolescent Health and Development*.  
606 Washington (DC): The International Bank for Reconstruction and Development / The  
607 World Bank© 2017, 2017.
- 608 15. Astrup A, Bügel S. Overfed but undernourished: recognizing nutritional  
609 inadequacies/deficiencies in patients with overweight or obesity. *International Journal*  
610 *of Obesity* 2019;43(2):219-32. doi: 10.1038/s41366-018-0143-9
- 611 16. Zhao L, Zhang X, Shen Y, et al. Obesity and iron deficiency: a quantitative meta-  
612 analysis. *Obesity Reviews* 2015;16(12):1081-93. doi:  
613 <https://doi.org/10.1111/obr.12323>
- 614 17. Gu K, Xiang W, Zhang Y, et al. The association between serum zinc level and  
615 overweight/obesity: a meta-analysis. *Eur J Nutr* 2019;58(8):2971-82. doi:  
616 10.1007/s00394-018-1876-x [published Online First: 20181212]

- 617 18. Saeed A, Dullaart RPF, Schreuder T, et al. Disturbed Vitamin A Metabolism in Non-  
618 Alcoholic Fatty Liver Disease (NAFLD). *Nutrients* 2017;10(1) doi:  
619 10.3390/nu10010029 [published Online First: 20171229]  
620 19. Lowe NM. The global challenge of hidden hunger: perspectives from the field. *Proc Nutr*  
621 *Soc* 2021;80(3):283-89. doi: 10.1017/S0029665121000902 [published Online First:  
622 2021/04/26]  
623 20. Poti JM, Braga B, Qin B. Ultra-processed Food Intake and Obesity: What Really Matters  
624 for Health-Processing or Nutrient Content? *Curr Obes Rep* 2017;6(4):420-31. doi:  
625 10.1007/s13679-017-0285-4  
626 21. Moore JB. COVID-19, childhood obesity, and NAFLD: colliding pandemics. *Lancet*  
627 *Gastroenterol Hepatol* 2022;7(6):499-501. doi: 10.1016/s2468-1253(22)00100-5  
628 22. Popkin BM, Corvalan C, Grummer-Strawn LM. Dynamics of the double burden of  
629 malnutrition and the changing nutrition reality. *Lancet* 2020;395(10217):65-74. doi:  
630 10.1016/s0140-6736(19)32497-3 [published Online First: 2019/12/20]  
631 23. Di Cesare M, Sorić M, Bovet P, et al. The epidemiological burden of obesity in childhood:  
632 a worldwide epidemic requiring urgent action. *BMC Medicine* 2019;17(1):212. doi:  
633 10.1186/s12916-019-1449-8  
634 24. Castillo-Valenzuela O, Duarte L, Arredondo M, et al. Childhood Obesity and Plasma  
635 Micronutrient Deficit of Chilean Children between 4 and 14 Years Old. *Nutrients*  
636 2023;15(7):1707.  
637 25. Tan PY, Mohd Johari SN, Teng KT, et al. High prevalence of malnutrition and vitamin A  
638 deficiency among schoolchildren of rural areas in Malaysia using a multi-school  
639 assessment approach. *British Journal of Nutrition* 2023;129(3):454-67. doi:  
640 10.1017/S0007114522001398  
641 26. Goyena EA, Maniego MLV, Ducay AJD, et al. Dietary zinc intake and the underlying  
642 factors of serum zinc deficiency among preschool children in the Philippines.  
643 *Philippine Journal of Science* 2021;150(3):799-812.  
644 27. Ssentongo P, Ba DM, Ssentongo AE, et al. Association of vitamin A deficiency with early  
645 childhood stunting in Uganda: A population-based cross-sectional study. *PLoS One*  
646 2020;15(5):e0233615. doi: 10.1371/journal.pone.0233615 [published Online First:  
647 2020/05/30]  
648 28. Cobayashi F, Augusto RA, Lourenco BH, et al. Factors associated with stunting and  
649 overweight in Amazonian children: a population-based, cross-sectional study. *Public*  
650 *Health Nutr* 2014;17(3):551-60. doi: 10.1017/S1368980013000190 [published Online  
651 First: 2013/03/05]  
652 29. Prentice AM. The Triple Burden of Malnutrition in the Era of Globalization. *Nestle Nutr*  
653 *Inst Workshop Ser* 2023;97:51-61. doi: 10.1159/000529005 [published Online First:  
654 20230406]  
655 30. Malden S, Gillespie J, Hughes A, et al. Obesity in young children and its relationship with  
656 diagnosis of asthma, vitamin D deficiency, iron deficiency, specific allergies and flat-  
657 footedness: A systematic review and meta-analysis. *Obes Rev* 2021;22(3):e13129.  
658 doi: 10.1111/obr.13129 [published Online First: 20200818]  
659 31. Fiamenghi VI, Mello ED. Vitamin D deficiency in children and adolescents with obesity: a  
660 meta-analysis. *J Pediatr (Rio J)* 2021;97(3):273-79. doi: 10.1016/j.jped.2020.08.006  
661 [published Online First: 20201003]  
662 32. Moher D, Liberati A, Tetzlaff J, et al. Reprint--preferred reporting items for systematic  
663 reviews and meta-analyses: the PRISMA statement. *Phys Ther* 2009;89(9):873-80.  
664 [published Online First: 2009/09/03]  
665 33. Sawyer SM, Azzopardi PS, Wickremarathne D, et al. The age of adolescence. *The*  
666 *Lancet Child & Adolescent Health* 2018;2(3):223-28.  
667 34. Ouzzani M, Hammady H, Fedorowicz Z, et al. Rayyan—a web and mobile app for  
668 systematic reviews. *Systematic Reviews* 2016;5(1):210. doi: 10.1186/s13643-016-  
669 0384-4  
670 35. Academy of Nutrition and Dietetics. Evidence Analysis Manual: Academy of Nutrition and  
671 Dietetics 2016.

- 672 36. Jackson D, Turner R. Power analysis for random-effects meta-analysis. *Res Synth*  
673 *Methods* 2017;8(3):290-302. doi: 10.1002/jrsm.1240 [published Online First:  
674 2017/04/06]
- 675 37. Wickham H. ggplot2: Elegant Graphics for Data Analysis: Springer-Verlag New York  
676 2016.
- 677 38. Brunson JC. ggalluvial: Layered Grammar for Alluvial Plots. *Journal of Open Source*  
678 *Software* 2020;5(49):2017. doi: <https://joss.theoj.org/papers/10.21105/joss.02017>
- 679 39. South A. rworldmap : a new R package for mapping global data. *The R Journal*  
680 2011;3(1):35-43.
- 681 40. R: A Language and Environment for Statistical Computing [program]. Vienna, Austria: R  
682 Foundation for Statistical Computing, 2023.
- 683 41. Park JS, Chang JY, Hong J, et al. Nutritional zinc status in weaning infants: association  
684 with iron deficiency, age, and growth profile. *Biol Trace Elem Res* 2012;150(1-3):91-  
685 102. doi: 10.1007/s12011-012-9509-3 [published Online First: 2012/10/12]
- 686 42. Lu J, Zhang H, Cao W, et al. Study on the Zinc Nutritional Status and Risk Factors of  
687 Chinese 6-18-Year-Old Children. *Nutrients* 2023;15(7) doi:  
688 <https://dx.doi.org/10.3390/nu15071685>
- 689 43. Kernan KF, Carcillo JA. Hyperferritinemia and inflammation. *Int Immunol* 2017;29(9):401-  
690 09. doi: 10.1093/intimm/dxx031
- 691 44. World Health Organization. WHO guideline on use of ferritin concentrations to assess  
692 iron status in individuals and populations. . Geneva2020.
- 693 45. Sethy PGS, Bulliyya G, Rautray TR, et al. Nutritional Status of Preschool Children in  
694 Association with Some Trace Elements in Rural Gram Panchayatas of Bhubaneswar,  
695 Odisha, India. *Advanced Science Letters* 2014;20(3):868-73. doi:  
696 10.1166/asl.2014.5414
- 697 46. Brotanek JM, Gosz J, Weitzman M, et al. Iron deficiency in early childhood in the United  
698 States: risk factors and racial/ethnic disparities. *Pediatrics* 2007;120(3):568-75. doi:  
699 10.1542/peds.2007-0572 [published Online First: 2007/09/04]
- 700 47. Nead KG, Halterman JS, Kaczorowski JM, et al. Overweight children and adolescents: a  
701 risk group for iron deficiency. *Pediatrics* 2004;114(1):104-8. doi:  
702 10.1542/peds.114.1.104 [published Online First: 2004/07/03]
- 703 48. Tussing-Humphreys LM, Liang H, Nemeth E, et al. Excess adiposity, inflammation, and  
704 iron-deficiency in female adolescents. *J Am Diet Assoc* 2009;109(2):297-302. doi:  
705 10.1016/j.jada.2008.10.044 [published Online First: 2009/01/27]
- 706 49. Cepeda-Lopez AC, Osendarp SJ, Melse-Boonstra A, et al. Sharply higher rates of iron  
707 deficiency in obese Mexican women and children are predicted by obesity-related  
708 inflammation rather than by differences in dietary iron intake. *Am J Clin Nutr*  
709 2011;93(5):975-83. doi: 10.3945/ajcn.110.005439 [published Online First:  
710 2011/03/18]
- 711 50. Cabañas Pujadas G, Ortiz-Marrón H, Ortiz-Pinto MA, et al. Changes in obesity and iron  
712 deficiency between 4 and 9 years of age. Longitudinal study of childhood obesity  
713 (ELOIN). *International Journal of Obesity* 2022;46(11):1992-99. doi: 10.1038/s41366-  
714 022-01196-y
- 715 51. Manios Y, Moschonis G, Chrousos GP, et al. The double burden of obesity and iron  
716 deficiency on children and adolescents in Greece: the Healthy Growth Study. *J Hum*  
717 *Nutr Diet* 2013;26(5):470-8. doi: 10.1111/jhn.12025 [published Online First:  
718 2013/01/03]
- 719 52. Moschonis G, Chrousos GP, Lionis C, et al. Association of total body and visceral fat  
720 mass with iron deficiency in preadolescents: the Healthy Growth Study. *Br J Nutr*  
721 2012;108(4):710-9. doi: 10.1017/S0007114511005952 [published Online First:  
722 2011/11/18]
- 723 53. Higgins JT, J; Chandler, J; Cumpston, M; Li, T; Page, MJ; Welch, VA. Cochrane  
724 Handbook for Systematic Reviews of Interventions version 6.4 Cochrane, 2023.



- 725 54. Eftekhari M, Mozaffari-Khosravi H, Shidfar F. The relationship between BMI and iron  
726 status in iron-deficient adolescent Iranian girls. *Public Health Nutr* 2009;12(12):2377-  
727 81. doi: 10.1017/S1368980009005187 [published Online First: 2009/03/13]
- 728 55. Zimmermann MB, Zeder C, Muthayya S, et al. Adiposity in women and children from  
729 transition countries predicts decreased iron absorption, iron deficiency and a reduced  
730 response to iron fortification. *Int J Obes (Lond)* 2008;32(7):1098-104. doi:  
731 10.1038/ijo.2008.43 [published Online First: 2008/04/23]
- 732 56. Naupal-Forcadilla RT, Barba CV, Talavera MTM, et al. Determinants of Zinc Status of 2-  
733 3-Year-Old Children in Laguna, Philippines. *Malaysian Journal of Nutrition*  
734 2017;23(1)
- 735 57. International Zinc Nutrition Consultative Group. Assessing population zinc status with  
736 serum zinc concentration. 2012.  
737 [https://static1.squarespace.com/static/56424f6ce4b0552eb7fdc4e8/t/5774378f414fb5](https://static1.squarespace.com/static/56424f6ce4b0552eb7fdc4e8/t/5774378f414fb5410541b748/1467234199261/IZiNCG_TechBrief2_2012-3.pdf)  
738 [410541b748/1467234199261/IZiNCG\\_TechBrief2\\_2012-3.pdf](https://static1.squarespace.com/static/56424f6ce4b0552eb7fdc4e8/t/5774378f414fb5410541b748/1467234199261/IZiNCG_TechBrief2_2012-3.pdf).
- 739 58. Lowe NM, Fekete K, Decsi T. Methods of assessment of zinc status in humans: a  
740 systematic review234. *The American Journal of Clinical Nutrition* 2009;89(6):2040S-  
741 51S. doi: <https://doi.org/10.3945/ajcn.2009.27230G>
- 742 59. Thillan K, Lanerolle P, Thoradeniya T, et al. Micronutrient status and associated factors  
743 of adiposity in primary school children with normal and high body fat in Colombo  
744 municipal area, Sri Lanka. *BMC Pediatrics* 2021;21(1):14. doi:  
745 <https://dx.doi.org/10.1186/s12887-020-02473-3>
- 746 60. Yalcin SS, Firat MC, Tosun E, et al. A possible etiological factor in obesity: element  
747 status in blood and tooth of overweight versus normal-weight children. *Int J Environ*  
748 *Health Res* 2018;1-13. doi: 10.1080/09603123.2018.1531115 [published Online First:  
749 2018/10/16]
- 750 61. Zhu Q, Dai Y, Zhang J, et al. Association between serum zinc concentrations and  
751 metabolic risk factors among Chinese children and adolescents. *The British journal of*  
752 *nutrition* 2021;126(10):1529-36. doi: <https://dx.doi.org/10.1017/S0007114521000258>
- 753 62. Fan Y, Zhang C, Bu J. Relationship between Selected Serum Metallic Elements and  
754 Obesity in Children and Adolescent in the U.S. *Nutrients* 2017;9(2) doi:  
755 10.3390/nu9020104 [published Online First: 2017/02/07]
- 756 63. Perrone L, Gialanella G, Moro R, et al. Zinc, copper, and iron in obese children and  
757 adolescents. *Nutrition research* 1998;18(2):183-89.
- 758 64. Dehghani SM, Katibeh P, Haghghat M, et al. Prevalence of zinc deficiency in 3-18 years  
759 old children in shiraz-iran. *Iran Red Crescent Med J* 2011;13(1):4-8. [published  
760 Online First: 2011/01/01]
- 761 65. Habib A, Molayemat M, Habib A, et al. Vitamin D and Zinc are Interlinked But Affected by  
762 Different Growth Factors in Iranian Children and Adolescents: Vitamin D and Zinc in  
763 Iranian Children and Adolescents. *Iranian Journal of Pediatrics* 2022;32(6) doi:  
764 10.5812/ijp-127158
- 765 66. Sharif Y, Sadeghi O, Dorosty A, et al. Serum Levels of Vitamin D, Retinol and Zinc in  
766 Relation to overweight among Toddlers: Findings from a National Study in Iran. *Arch*  
767 *Iran Med* 2019;22(4):174-81. [published Online First: 2019/05/28]
- 768 67. Li W, Herran OF, Villamor E. Trends in Iron, Zinc, and Vitamin A Status Biomarkers  
769 Among Colombian Children: Results From 2 Nationally Representative Surveys.  
770 *Food Nutr Bull* 2017;38(2):146-57. doi: 10.1177/0379572117700976 [published  
771 Online First: 2017/04/01]
- 772 68. Ho M, Baur LA, Cowell CT, et al. Zinc status, dietary zinc intake and metabolic risk in  
773 Australian children and adolescents; Nepean Longitudinal Study. *Eur J Nutr*  
774 2017;56(7):2407-14. doi: 10.1007/s00394-016-1280-3 [published Online First:  
775 2016/08/01]
- 776 69. Zou Y, Zhang R, Huang L, et al. Serum levels of vitamin D, retinol, zinc, and CRP in  
777 relation to obesity among children and adolescents. *European Journal of Medical*  
778 *Research* 2022;27(1):51. doi: <https://dx.doi.org/10.1186/s40001-022-00670-7>

- 779 70. Lin CN, Wilson A, Church BB, et al. Pediatric reference intervals for serum copper and  
780 zinc. *Clin Chim Acta* 2012;413(5-6):612-5. doi: 10.1016/j.cca.2011.12.005 [published  
781 Online First: 20111213]
- 782 71. EFSA Panel on Dietetic Products, Nutrition and Allergies. Scientific Opinion on Dietary  
783 Reference Values for zinc. *EFSA Journal* 2014;12(10):3844. doi:  
784 <https://doi.org/10.2903/j.efsa.2014.3844>
- 785 72. Centers for Disease Control and Prevention WHO, Nutrition International, UNICEF. .  
786 Micronutrient survey manual. Geneva: World Health Organization, 2020.
- 787 73. Gunanti IR, Marks GC, Al-Mamun A, et al. Low serum concentrations of carotenoids and  
788 vitamin E are associated with high adiposity in Mexican-American children. *J Nutr*  
789 2014;144(4):489-95. doi: 10.3945/jn.113.183137 [published Online First: 2014/02/07]
- 790 74. Hu W, Tong S, Oldenburg B, et al. Serum vitamin A concentrations and growth in  
791 children and adolescents in Gansu Province, China. *Asia Pac J Clin Nutr*  
792 2001;10(1):63-6. doi: 10.1046/j.1440-6047.2001.00208.x [published Online First:  
793 2001/11/16]
- 794 75. Ortega-Senovilla H, de Oya M, Garces C. Relationship of NEFA concentrations to RBP4  
795 and to RBP4/retinol in prepubertal children with and without obesity. *J Clin Lipidol*  
796 2019;13(2):301-07. doi: 10.1016/j.jacl.2019.01.006 [published Online First:  
797 2019/02/19]
- 798 76. Tian T, Wang Y, Xie W, et al. Associations between Serum Vitamin A and Metabolic Risk  
799 Factors among Eastern Chinese Children and Adolescents. *Nutrients*  
800 2022;14(3):610. doi: <https://dx.doi.org/10.3390/nu14030610>
- 801 77. Yang C, Chen J, Liu Z, et al. Association of Vitamin A Status with Overnutrition in  
802 Children and Adolescents. *Int J Environ Res Public Health* 2015;12(12):15531-9. doi:  
803 10.3390/ijerph121214998 [published Online First: 2015/12/23]
- 804 78. Disalvo L, Varea A, Matamoros N, et al. Vitamin A deficiency and associated factors in  
805 preschoolers from the outskirts of La Plata, Buenos Aires. *Arch Argent Pediatr*  
806 2019;117(1):19-25. doi: 10.5546/aap.2019.eng.19 [published Online First:  
807 2019/01/18]
- 808 79. Maslova E, Mora-Plazas M, Forero Y, et al. Are Vitamin A and Iron Deficiencies Re-  
809 Emerging in Urban Latin America? A Survey of Schoolchildren in Bogota, Colombia.  
810 *Food and Nutrition Bulletin* 2009;30(2):103-11. doi: 10.1177/156482650903000201
- 811 80. Abd-El Wahed MA, Mohamed MH, Ibrahim SS, et al. Iron profile and dietary pattern of  
812 primary school obese Egyptian children. *J Egypt Public Health Assoc* 2014;89(2):53-  
813 9. doi: 10.1097/01.EPX.0000451827.84315.5c [published Online First: 2014/08/28]
- 814 81. de Souza Valente da Silva L, Valeria da Veiga G, Ramalho RA. Association of serum  
815 concentrations of retinol and carotenoids with overweight in children and  
816 adolescents. *Nutrition* 2007;23(5):392-7. doi: 10.1016/j.nut.2007.02.009 [published  
817 Online First: 2007/04/17]
- 818 82. Paes-Silva RP, Gadelha P, Lemos M, et al. Adiposity, inflammation and fat-soluble  
819 vitamins in adolescents. *J Pediatr (Rio J)* 2019;95(5):575-83. doi:  
820 10.1016/j.jped.2018.05.008 [published Online First: 2018/07/03]
- 821 83. Dallazen C, Tietzmann DC, Da Silva SA, et al. Vitamin A deficiency and associated risk  
822 factors in children aged 12-59 months living in poorest municipalities in the South  
823 Region of Brazil. *Public Health Nutrition* 2023;26(1):132-42. doi:  
824 10.1017/S1368980022000325
- 825 84. Wei X, Peng R, Cao J, et al. Serum vitamin A status is associated with obesity and the  
826 metabolic syndrome among school-age children in Chongqing, China. *Asia Pac J*  
827 *Clin Nutr* 2016;25(3):563-70. doi: 10.6133/apjcn.092015.03 [published Online First:  
828 2016/07/22]
- 829 85. Hutchinson C. A review of iron studies in overweight and obese children and  
830 adolescents: a double burden in the young? *European Journal of Nutrition*  
831 2016;55(7):2179-97. doi: 10.1007/s00394-016-1155-7



- 832 86. González-Domínguez Á, Visiedo-García FM, Domínguez-Riscart J, et al. Iron  
833 Metabolism in Obesity and Metabolic Syndrome. *International Journal of Molecular*  
834 *Sciences* 2020;21(15):5529.
- 835 87. Haschka D, Hoffmann A, Weiss G. Iron in immune cell function and host defense.  
836 *Seminars in Cell & Developmental Biology* 2021;115:27-36. doi:  
837 <https://doi.org/10.1016/j.semcdb.2020.12.005>
- 838 88. Weiss G, Ganz T, Goodnough LT. Anemia of inflammation. *Blood* 2019;133(1):40-50.  
839 doi: 10.1182/blood-2018-06-856500 [published Online First: 20181106]
- 840 89. Perng W, Mora-Plazas M, Marin C, et al. Iron status and linear growth: a prospective  
841 study in school-age children. *Eur J Clin Nutr* 2013;67(6):646-51. doi:  
842 10.1038/ejcn.2013.56 [published Online First: 2013/03/07]
- 843 90. Zhu Y, He B, Xiao Y, et al. Iron metabolism and its association with dyslipidemia risk in  
844 children and adolescents: a cross-sectional study. *Lipids Health Dis* 2019;18(1):50.  
845 doi: 10.1186/s12944-019-0985-8 [published Online First: 2019/02/14]
- 846 91. Cheng HL, Bryant CE, Rooney KB, et al. Iron, hepcidin and inflammatory status of young  
847 healthy overweight and obese women in Australia. *PLoS One* 2013;8(7):e68675. doi:  
848 10.1371/journal.pone.0068675 [published Online First: 2013/07/19]
- 849 92. Ferrari M, Cuenca-Garcia M, Valtuena J, et al. Inflammation profile in overweight/obese  
850 adolescents in Europe: an analysis in relation to iron status. *Eur J Clin Nutr*  
851 2015;69(2):247-55. doi: 10.1038/ejcn.2014.154 [published Online First: 2014/09/11]
- 852 93. Onabanjo OO, Balogun OL. Anthropometric and Iron Status of Adolescents From  
853 Selected Secondary Schools in Ogun State, Nigeria. *ICAN: Infant, Child, &*  
854 *Adolescent Nutrition* 2014;6(2):109-18. doi: 10.1177/1941406414520703
- 855 94. Ortiz Perez M, Vazquez Lopez MA, Ibanez Alcalde M, et al. Relationship between  
856 Obesity and Iron Deficiency in Healthy Adolescents. *Child Obes* 2020;16(6):440-47.  
857 doi: 10.1089/chi.2019.0276 [published Online First: 2020/09/03]
- 858 95. Pompano LM, Correa-Burrows P, Burrows R, et al. Adjusting Ferritin Concentrations for  
859 Nonclinical Inflammation in Adolescents with Overweight or Obesity. *Journal of*  
860 *Pediatrics* 2022;244:125-32.e1. doi: 10.1016/j.jpeds.2022.01.012
- 861 96. Suteerotrakool O, Khongcharoensombat T, Chomtho S, et al. Anthropometric Markers  
862 and Iron Status of 6-12-Year-Old Thai Children: Associations and Predictors. *Journal*  
863 *of Nutrition and Metabolism* 2021;2021 doi: 10.1155/2021/9629718
- 864 97. Kassem E, Na'amni W, Shapira M, et al. Comparison between School-Age Children  
865 with and without Obesity in Nutritional and Inflammation Biomarkers. *Journal of*  
866 *Clinical Medicine* 2022;11(23):6973. doi: <https://dx.doi.org/10.3390/jcm11236973>
- 867 98. Shattnawi KK, Alomari MA, Al-Sheyab N, et al. The relationship between plasma ferritin  
868 levels and body mass index among adolescents. *Sci Rep* 2018;8(1):15307. doi:  
869 10.1038/s41598-018-33534-4 [published Online First: 2018/10/20]
- 870 99. Sypes EE, Parkin PC, Birken CS, et al. Higher Body Mass Index Is Associated with Iron  
871 Deficiency in Children 1 to 3 Years of Age. *J Pediatr* 2019;207:198-204 e1. doi:  
872 10.1016/j.jpeds.2018.11.035 [published Online First: 2019/01/12]
- 873 100. Pasricha S-R, Tye-Din J, Muckenthaler MU, et al. Iron deficiency. *The Lancet*  
874 2021;397(10270):233-48. doi: [https://doi.org/10.1016/S0140-6736\(20\)32594-0](https://doi.org/10.1016/S0140-6736(20)32594-0)
- 875 101. El Khoury R, Sleilaty G, Gannage-Yared MH. Prevalence of Iron deficiency in Lebanese  
876 schoolchildren. *Eur J Clin Nutr* 2020;74(8):1157-63. doi: 10.1038/s41430-020-0590-y  
877 [published Online First: 2020/03/05]
- 878 102. Tessema M, De Groote H, I DB, et al. Soil Zinc Is Associated with Serum Zinc But Not  
879 with Linear Growth of Children in Ethiopia. *Nutrients* 2019;11(2) doi:  
880 10.3390/nu11020221 [published Online First: 2019/01/27]
- 881 103. de Araújo LKAR, Faria JCP, Sarni ROS. Iron deficiency anemia in infants in Sousa  
882 (PB), Brazil: an association with nutritional status. *Revista da Associacao Medica*  
883 *Brasileira* 2022;68(12):1698-704. doi: 10.1590/1806-9282.20220761
- 884 104. Mei Z, Addo OY, Jefferds ME, et al. Physiologically based serum ferritin thresholds for  
885 iron deficiency in children and non-pregnant women: a US National Health and

- 886 Nutrition Examination Surveys (NHANES) serial cross-sectional study. *Lancet*  
887 *Haematol* 2021;8(8):e572-e82. doi: 10.1016/s2352-3026(21)00168-x
- 888 105. EFSA Panel on Dietetic Products, Nutrition and Allergies. Scientific Opinion on Dietary  
889 Reference Values for vitamin A. *EFSA Journal* 2015;13(3):4028. doi:  
890 <https://doi.org/10.2903/j.efsa.2015.4028>
- 891 106. Thurnham DI, McCabe LD, Haldar S, et al. Adjusting plasma ferritin concentrations to  
892 remove the effects of subclinical inflammation in the assessment of iron deficiency: a  
893 meta-analysis. *Am J Clin Nutr* 2010;92(3):546-55. doi: 10.3945/ajcn.2010.29284  
894 [published Online First: 20100707]
- 895 107. Larson LM, Guo J, Williams AM, et al. Approaches to Assess Vitamin A Status in  
896 Settings of Inflammation: Biomarkers Reflecting Inflammation and Nutritional  
897 Determinants of Anemia (BRINDA) Project. *Nutrients* 2018;10(8) doi:  
898 10.3390/nu10081100 [published Online First: 20180816]
- 899 108. McDonald CM, Suchdev PS, Krebs NF, et al. Adjusting plasma or serum zinc  
900 concentrations for inflammation: Biomarkers Reflecting Inflammation and Nutritional  
901 Determinants of Anemia (BRINDA) project. *Am J Clin Nutr* 2020;111(4):927-37. doi:  
902 10.1093/ajcn/nqz304
- 903 109. Namaste SM, Aaron GJ, Varadhan R, et al. Methodologic approach for the Biomarkers  
904 Reflecting Inflammation and Nutritional Determinants of Anemia (BRINDA) project.  
905 *Am J Clin Nutr* 2017;106(Suppl 1):333s-47s. doi: 10.3945/ajcn.116.142273  
906 [published Online First: 20170614]
- 907 110. Namaste SM, Rohner F, Huang J, et al. Adjusting ferritin concentrations for  
908 inflammation: Biomarkers Reflecting Inflammation and Nutritional Determinants of  
909 Anemia (BRINDA) project. *Am J Clin Nutr* 2017;106(Suppl 1):359s-71s. doi:  
910 10.3945/ajcn.116.141762 [published Online First: 20170614]
- 911 111. Estimates UWWBGJCM. LEVELS AND TRENDS IN CHILD MALNUTRITION. 2018
- 912 112. Aslam S, Emmanuel P. Formulating a researchable question: A critical step for  
913 facilitating good clinical research. *Indian J Sex Transm Dis AIDS* 2010;31(1):47-50.  
914 doi: 10.4103/0253-7184.69003
- 915 113. Grant CC, Wall CR, Brunt D, et al. Population prevalence and risk factors for iron  
916 deficiency in Auckland, New Zealand. *J Paediatr Child Health* 2007;43(7-8):532-8.  
917 doi: 10.1111/j.1440-1754.2007.01129.x [published Online First: 2007/07/20]
- 918 114. Higgins V, Omid A, Tahmasebi H, et al. Marked Influence of Adiposity on Laboratory  
919 Biomarkers in a Healthy Cohort of Children and Adolescents. *J Clin Endocrinol*  
920 *Metab* 2020;105(4) doi: 10.1210/clinem/dgz161 [published Online First: 2019/12/18]
- 921 115. Alaofe H, Burney J, Naylor R, et al. Prevalence of anaemia, deficiencies of iron and  
922 vitamin A and their determinants in rural women and young children: a cross-  
923 sectional study in Kalale district of northern Benin. *Public Health Nutr*  
924 2017;20(7):1203-13. doi: 10.1017/S1368980016003608 [published Online First:  
925 2017/01/26]
- 926 116. Al-Hussaini AA, Alshehry Z, AlDehaimi A, et al. Vitamin D and iron deficiencies among  
927 Saudi children and adolescents: A persistent problem in the 21st century. *Saudi*  
928 *Journal of Gastroenterology* 2022;28(2):157-64. doi:  
929 [https://dx.doi.org/10.4103/sjg.sjg\\_298\\_21](https://dx.doi.org/10.4103/sjg.sjg_298_21)
- 930 117. André HP, Vieira SA, Franceschini SdCC, et al. Factors associated with the iron  
931 nutritional status of Brazilian children aged 4 to 7 years. *Revista de Nutrição*  
932 2017;30(3):345-55. doi: 10.1590/1678-98652017000300007
- 933 118. Chitekwe S, Parajuli KR, Paudyal N, et al. Individual, household and national factors  
934 associated with iron, vitamin A and zinc deficiencies among children aged 6–59  
935 months in Nepal. *Maternal and Child Nutrition* 2022;18(S1) doi: 10.1111/mcn.13305
- 936 119. Ernawati F, Syauqy A, Arifin AY, et al. Micronutrient deficiencies and stunting were  
937 associated with socioeconomic status in Indonesian children aged 6–59 months.  
938 *Nutrients* 2021;13(6) doi: 10.3390/nu13061802

- 939 120. Ghosh A, Chowdhury SD, Ghosh T. Undernutrition in Nepalese children: a biochemical  
940 and haematological study. *Acta Paediatr* 2012;101(6):671-6. doi: 10.1111/j.1651-  
941 2227.2012.02613.x [published Online First: 2012/01/31]
- 942 121. Habib MA, Black K, Soofi SB, et al. Prevalence and Predictors of Iron Deficiency  
943 Anemia in Children under Five Years of Age in Pakistan, A Secondary Analysis of  
944 National Nutrition Survey Data 2011-2012. *PLoS One* 2016;11(5):e0155051. doi:  
945 10.1371/journal.pone.0155051 [published Online First: 2016/05/14]
- 946 122. Kurniawan YA, Muslimatun S, Achadi EL, et al. Anaemia and iron deficiency anaemia  
947 among young adolescent girls from the peri urban coastal area of Indonesia. *Asia  
948 Pac J Clin Nutr* 2006;15(3):350-6. [published Online First: 2006/07/14]
- 949 123. Khatib IM, Elmادfa I. High prevalence rates of anemia, vitamin A deficiency and  
950 stunting imperil the health status of Bedouin schoolchildren in North Badia, Jordan.  
951 *Ann Nutr Metab* 2009;55(4):358-67. doi: 10.1159/000258632 [published Online First:  
952 2009/11/20]
- 953 124. Kumari N, Goyal M, Tiwari RK. Correlation of Serum Biochemical Parameters and  
954 Oxidative Stress in Malnourished Children: A Case-control Study. *Journal of Clinical  
955 and Diagnostic Research* 2022;16(10):BC01-BC05. doi:  
956 <https://dx.doi.org/10.7860/JCDR/2022/58226.16890>
- 957 125. Matsungo TM, Kruger HS, Faber M, et al. The prevalence and factors associated with  
958 stunting among infants aged 6 months in a peri-urban South African community.  
959 *Public Health Nutr* 2017;20(17):3209-18. doi: 10.1017/S1368980017002087  
960 [published Online First: 2017/09/08]
- 961 126. Orsango AZ, Habtu W, Lejisa T, et al. Iron deficiency anemia among children aged 2–5  
962 years in southern Ethiopia: a community-based cross-sectional study. *PeerJ* 2021  
963 doi: 10.7717/peerj.11649
- 964 127. Shukla P, Pandey SK, Singh J, et al. Clinico-Etiopathogenesis of Vitamin B12, Folic  
965 Acid and Iron Deficiency in Severe Acute Malnutrition Children: A Tertiary Care  
966 Hospital Experience from Central India. *Indian Journal of Clinical Biochemistry* 2023  
967 doi: 10.1007/s12291-022-01100-5
- 968 128. Engle-Stone R, Ndjebayi AO, Nankap M, et al. Stunting prevalence, plasma zinc  
969 concentrations, and dietary zinc intakes in a nationally representative sample  
970 suggest a high risk of zinc deficiency among women and young children in  
971 Cameroon. *J Nutr* 2014;144(3):382-91. doi: 10.3945/jn.113.188383 [published Online  
972 First: 2014/01/24]
- 973 129. Galetti V, Mitchikpè CE, Kujinga P, et al. Rural Beninese Children Are at Risk of Zinc  
974 Deficiency According to Stunting Prevalence and Plasma Zinc Concentration but Not  
975 Dietary Zinc Intakes. *Journal of nutrition* 2016;146(1):114-23. doi:  
976 10.3945/jn.115.216606
- 977 130. Gibson RS, Manger MS, Krittaphol W, et al. Does zinc deficiency play a role in stunting  
978 among primary school children in NE Thailand? *Br J Nutr* 2007;97(1):167-75. doi:  
979 10.1017/S0007114507250445 [published Online First: 2007/01/16]
- 980 131. Kongsbak K, Wahed MA, Friis H, et al. Acute Phase Protein Levels, T. trichiura, and  
981 Maternal Education Are Predictors of Serum Zinc in a Cross-Sectional Study in  
982 Bangladeshi Children. *The Journal of Nutrition* 2006;136(8):2262-68. doi:  
983 10.1093/jn/136.8.2262
- 984 132. Marasinghe E, Chackrewarthy S, Abeysena C, et al. Micronutrient status and its  
985 relationship with nutritional status in preschool children in urban Sri Lanka. *Asia Pac  
986 J Clin Nutr* 2015;24(1):144-51. doi: 10.6133/apjcn.2015.24.1.17 [published Online  
987 First: 2015/03/06]
- 988 133. Nasiri-babadi P, Sadeghian M, Sadeghi O, et al. The association of serum levels of zinc  
989 and vitamin D with wasting among Iranian pre-school children. *Eating and Weight  
990 Disorders* 2021;26(1):211-18. doi: 10.1007/s40519-019-00834-1
- 991 134. Okafor AMA, Ikwumere CM, Egumgbe UD, et al. Prevalence and determining factors of  
992 stunting among school-aged children in a rural nigerian community: A cross-sectional

- 993 study. *Current Research in Nutrition and Food Science* 2021;9(2):409-22. doi:  
994 10.12944/CRNFSJ.9.2.05
- 995 135. Van Nhien N, Yabutani T, Khan NC, et al. Association of low serum selenium with  
996 anemia among adolescent girls living in rural Vietnam. *Nutrition* 2009;25(1):6-10. doi:  
997 10.1016/j.nut.2008.06.032 [published Online First: 2008/08/30]
- 998 136. Yazbeck N, Hanna-Wakim R, El Rafei R, et al. Dietary Zinc Intake and Plasma Zinc  
999 Concentrations in Children with Short Stature and Failure to Thrive. *Ann Nutr Metab*  
1000 2016;69(1):9-14. doi: 10.1159/000447648 [published Online First: 2016/07/09]
- 1001 137. Adamu A, Jiya NM, Ahmed H, et al. Prevalence of Vitamin A Deficiency among  
1002 Malnourished Children in Usmanu Danfodiyo University Teaching Hospital, Sokoto,  
1003 Northwestern Nigeria. *Pakistan Journal of Nutrition* 2016;15(9):821-28. doi:  
1004 10.3923/pjn.2016.821.828
- 1005 138. Ahmed F, Rahman A, Noor AN, et al. Anaemia and vitamin A status among adolescent  
1006 schoolboys in Dhaka City, Bangladesh. *Public Health Nutrition* 2006;9(3):345-50. doi:  
1007 10.1079/PHN2005858 [published Online First: 2007/01/02]
- 1008 139. Kurugol Z, Egemen A, Keskinoglu P, et al. Vitamin A deficiency in healthy children aged  
1009 6-59 months in Izmir Province of Turkey. *Paediatric and perinatal epidemiology*  
1010 2000;14:64-9. doi: 10.1046/j.1365-3016.2000.00229.x
- 1011 140. Oso OO, Abiodun PO, Omotade OO, et al. Vitamin A status and nutritional intake of  
1012 carotenoids of preschool children in Ijaye Orile community in Nigeria. *J Trop Pediatr*  
1013 2003;49(1):42-7. doi: 10.1093/tropej/49.1.42 [published Online First: 2003/03/13]
- 1014 141. Samba C, Tchibindat F, Houze P, et al. Prevalence of infant Vitamin A deficiency and  
1015 undernutrition in the Republic of Congo. *Acta Trop* 2006;97(3):270-83. doi:  
1016 10.1016/j.actatropica.2005.11.008 [published Online First: 2006/02/16]
- 1017
